1 **A SARS-CoV-2 spike ferritin nanoparticle vaccine protects against heterologous**  
2 **challenge with B.1.1.7 and B.1.351 virus variants in Syrian golden hamsters**

3

4 Kathryn McGuckin Wuertz<sup>1</sup>, Erica K. Barkei<sup>2</sup>, Wei-Hung Chen<sup>3,4</sup>, Elizabeth J. Martinez<sup>3,4</sup>, Ines  
5 Lakhal-Naouar<sup>4,5</sup>, Linda L. Jagodzinski<sup>5</sup>, Dominic Paquin-Proulx<sup>1,4</sup>, Gregory D. Gromowski<sup>6</sup>,  
6 Isabella Swafford<sup>1,4</sup>, Akshaya Ganesh<sup>1,7</sup>, Ming Dong<sup>1,4</sup>, Xiankun Zeng<sup>8</sup>, Paul V. Thomas<sup>3,4</sup>,  
7 Rajeshwer S. Sankhala<sup>3,4</sup>, Agnes Hajduczyk<sup>3,4</sup>, Caroline E. Peterson<sup>3,4</sup>, Caitlin Kuklis<sup>6</sup>, Sandrine  
8 Soman<sup>6</sup>, Lindsay Wieczorek<sup>1,4</sup>, Michelle Zemil<sup>1,4</sup>, Alexander Anderson<sup>3,7</sup>, Janice Darden<sup>4,5</sup>,  
9 Heather Hernandez<sup>4,5</sup>, Hannah Grove<sup>4,5</sup>, Vincent Dussupt<sup>1,4</sup>, Holly Hack<sup>4,5</sup>, Rafael de la Barrera<sup>9</sup>,  
10 Stasya Zarling<sup>9</sup>, James F. Wood<sup>9</sup>, Jeffrey W. Froude<sup>9</sup>, Matthew Gagne<sup>10</sup>, Amy R. Henry<sup>10</sup>, Elham  
11 Bayat Mokhtari<sup>11</sup>, Prakriti Mudvari<sup>11</sup>, Shelly J. Krebs<sup>1,4</sup>, Andrew S. Pekosz<sup>12</sup>, Jeffrey R. Currier<sup>6</sup>,  
12 Swagata Kar<sup>13</sup>, Maciel Porto<sup>13</sup>, Adrienne Winn<sup>13</sup>, Kamil Radzyminski<sup>13</sup>, Mark G. Lewis<sup>13</sup>, Sandhya  
13 Vasan<sup>4</sup>, Mehul Suthar<sup>14</sup>, Victoria R. Polonis<sup>1</sup>, Gary R. Matyas<sup>1</sup>, Eli A. Boritz<sup>11</sup>, Daniel C. Douek<sup>10</sup>,  
14 Robert A. Seder<sup>15</sup>, Sharon P. Daye<sup>16</sup>, Mangala Rao<sup>1</sup>, Sheila A. Peel<sup>5</sup>, M. Gordon Joyce<sup>3,4,18</sup>, Diane  
15 L. Bolton<sup>1,4,18</sup>, Nelson L. Michael<sup>17,18,\*</sup> and Kayvon Modjarrad<sup>3,18,\*</sup>

16

17 <sup>1</sup>U.S. Military HIV Research Program, Center for Infectious Diseases Research, Walter Reed Army Institute of  
18 Research, Silver Spring, Maryland USA

19 <sup>2</sup>Veterinary Pathology Division, Walter Reed Army Institute of Research, Silver Spring, Maryland USA

20 <sup>3</sup>Emerging Infectious Diseases Branch, Center for Infectious Diseases Research, Walter Reed Army Institute of  
21 Research, Silver Spring, Maryland USA

22 <sup>4</sup>Henry M. Jackson Foundation for the Advancement of Military Medicine, Bethesda, Maryland USA

23 <sup>5</sup>Diagnostics Countermeasures Branch, Center for Infectious Diseases Research, Walter Reed Army Institute of  
24 Research, Silver Spring, Maryland USA

25 <sup>6</sup>Virus Diseases Branch, Center for Infectious Diseases Research, Walter Reed Army Institute of Research, Silver  
26 Spring, Maryland USA

27 <sup>7</sup>Oak Ridge Institute of Science and Education, Oak Ridge, Tennessee USA

28 <sup>8</sup>Pathology Division, United States Army Medical Research Institute of Infectious Diseases, Fort Detrick, Frederick,  
29 Maryland USA

30 <sup>9</sup>Pilot Bioproduction Facility, Walter Reed Army Institute of Research, Silver Spring, Maryland USA

31 <sup>10</sup>Human Immunology Section, Vaccine Research Center, National Institute of Allergy and Infectious Diseases,  
32 National Institutes of Health, Bethesda, Maryland USA

33 <sup>11</sup>Virus Persistence and Dynamics Section, Vaccine Research Center, National Institute of Allergy and Infectious  
34 Diseases, National Institutes of Health, Bethesda, Maryland USA

35 <sup>12</sup>W. Harry Feinstone Department of Molecular Microbiology and Immunology, Johns Hopkins Bloomberg School of  
36 Public Health, Baltimore, Maryland USA

37 <sup>13</sup>BioQual, Inc., Rockville, Maryland USA

38 <sup>14</sup>Emory Vaccine Center, Department of Pediatrics, Emory School of Medicine, Atlanta, Georgia USA

39 <sup>15</sup>Cellular Immunology Section, Vaccine Research Center, National Institute of Allergy and Infectious Diseases,  
40 National Institutes of Health, Bethesda, Maryland USA

41 <sup>16</sup>One Health Branch, Walter Reed Army Institute of Research, Silver Spring, Maryland USA

42 <sup>17</sup>Center for Infectious Diseases Research, Walter Reed Army Institute of Research, Silver Spring, Maryland USA

43 <sup>18</sup>These authors contributed equally.

44

45 \*Corresponding authors:

46 Nelson L. Michael, M.D., Ph.D., [nelson.l.michael2.civ@mail.mil](mailto:nelson.l.michael2.civ@mail.mil)

47 Kayvon Modjarrad, M.D., Ph.D., [kayvon.modjarrad.civ@mail.mil](mailto:kayvon.modjarrad.civ@mail.mil)

48 **Abstract**

49 **The emergence of SARS-CoV-2 variants of concern (VOC) requires adequate coverage of vaccine**  
50 **protection. We evaluated whether a spike ferritin nanoparticle vaccine (SpFN), adjuvanted**  
51 **with the Army Liposomal Formulation QS21 (ALFQ), conferred protection against the B.1.1.7**  
52 **and B.1.351 VOCs in Syrian golden hamsters. SpFN-ALFQ was administered as either single or**  
53 **double-vaccination (0 and 4 week) regimens, using a high (10 µg) or low (0.2 µg) immunogen**  
54 **dose. Animals were intranasally challenged at week 11. Binding antibody responses were**  
55 **comparable between high- and low-dose groups. Neutralizing antibody titers were equivalent**  
56 **against WA1, B.1.1.7, and B.1.351 variants following two high dose two vaccinations. SpFN-**  
57 **ALFQ vaccination protected against SARS-CoV-2-induced disease and viral replication following**  
58 **intranasal B.1.1.7 or B.1.351 challenge, as evidenced by reduced weight loss, lung pathology,**  
59 **and lung and nasal turbinate viral burden. These data support the development of SpFN-ALFQ**  
60 **as a broadly protective, next-generation SARS-CoV-2 vaccine.**

61

## 62 **Introduction**

63 Since the beginning of the COVID-19 pandemic, an unprecedented global effort has resulted in  
64 the rapid emergence, and early regulatory authorization or approval, of multiple vaccines for use  
65 in humans<sup>1</sup>. The emergence of variants of concern (VOC) underscores the need for continued  
66 development of next-generation vaccines<sup>2,3</sup>. Increasingly, VOCs are becoming the dominant  
67 circulating lineages world-wide, owing to their increased transmissibility and potential to cause  
68 breakthrough infection in vaccinated individuals. Two VOCs have gained particular attention:  
69 B.1.1.7 and B.1.351, first detected in the United Kingdom and in the Republic of South Africa,  
70 respectively<sup>4-10</sup>. Recent studies have shown markedly reduced cross-neutralizing antibody  
71 responses from convalescent and vaccinee sera against both VOCs, but B.1.351 in particular  
72 <sup>4,5,8,11-14</sup>. Consequently, there has been a renewed, global effort to new iterations of SARS-CoV-2  
73 vaccines confer protection against current and emerging SARS-CoV-2 VOCs<sup>4,15,16</sup>.

74  
75 We recently developed a novel SARS-CoV-2 vaccine that presents eight prefusion-stabilized spike  
76 glycoprotein trimers in an ordered array on a ferritin nanoparticle (SpFN) and adjuvanted with  
77 Army Liposomal Formulation QS21 (ALFQ). This formulation has demonstrated efficacy against  
78 the origin strain of SARS-CoV-2 (WA1) in both K18 murine and rhesus macaque viral challenge  
79 models<sup>17-20</sup>. In rhesus macaques, SpFN elicited a dose-dependent potent humoral and cellular  
80 immune response that translated into a precipitous reduction in viral load upper and lower  
81 airways of the animals, as well as protection from lung histopathology. Importantly,  
82 immunization induced cross-neutralizing antibodies against current circulating VOCs<sup>18</sup>. Building  
83 on these data, we evaluated the efficacy of SpFN-ALFQ to protect against virus challenge with

84 VOCs B.1.1.7 and B.1.351 in a Syrian golden hamster (SGH) challenge model . This animal model  
85 has become a standard in the field for pre-clinical SARS-CoV-2 vaccine development, as  
86 respiratory pathology in this model closely recapitulates human disease<sup>21-24</sup>.

87

88 Here, we demonstrate that SpFN adjuvanted with ALFQ (SpFN-ALFQ) generates strong binding  
89 antibody responses against the receptor binding domain and spike proteins of both B.1.1.7 and  
90 B.1.351, as well as potent neutralizing antibody responses against both VOCs. Consistent with  
91 development of a protective humoral response, we demonstrate that SpFN-ALFQ confers clear  
92 protection against upper respiratory tract disease following challenge with these VOCs, as  
93 demonstrated by less body weight loss and decreased tissue viral burden and lung pathology.  
94 The SpFN vaccine candidate is now currently under assessment in a human phase 1 clinical trial  
95 (ClinicalTrials.gov Identifier: NCT04784767). These data support further development of the  
96 vaccine as one that may be broadly applicable to multiple sarbecovirus lineages.

97

## 98 **Results**

99

### 100 **Hamster model to assess efficacy of SpFN-ALFQ against B.1.1.7 and B.1.351**

101 Prior studies have demonstrated that the SpFN-ALFQ vaccine is efficacious against the WA1 strain  
102 of SARS-CoV-2 in a nonhuman primate model<sup>18</sup>. The ability of this vaccine to confer protection  
103 against the VOC B.1.1.7, now prominent throughout the U.S. and other parts of the world, and  
104 B.1.351, prominent in Africa and emerging world-wide, is unknown. We evaluated vaccine  
105 immunogenicity and efficacy against VOCs in SGH due to the susceptibility of SGH to severe

106 clinical disease, lung pathology, and viral replication in the respiratory tract<sup>24,25</sup>. SpFN (Fig. 1a)  
107 adjuvanted with ALFQ was administered at a high (10 µg) or low dose (0.2 µg), selected based on  
108 immunogenicity and efficacy studies of SpFN-ALFQ in mice<sup>20</sup>, in a either a single (1) and two (2)-  
109 vaccination regimen in parallel with 2 injections of phosphate buffered saline (PBS) in control  
110 animals (Fig. 1b). Blood for serologic analysis was drawn periodically throughout the study, with  
111 key immunogenicity timepoints at weeks 6 and 8 (two and four weeks following last vaccine dose,  
112 respectively) and week 11 (seven weeks post final vaccine dose), preceding viral challenge.

113

#### 114 **Strong binding antibody responses elicited by two-dose SpFN-ALFQ vaccination**

115 Robust serum binding antibody responses to the SARS-CoV-2 WA1 spike protein (S-2P) and  
116 receptor-binding domain (RBD) were observed at week 6 by ELISA (Fig. 1c). Both the 1- and 2-  
117 dose regimens were immunogenic, with higher ELISA titers elicited by the 2-dose regimen against  
118 both RBD and spike (S-2P), while responses within regimens did not differ between doses.  
119 Endpoint titers against spike (S-2P) at week 6 demonstrated nearly a log difference between  
120 dosing regimens, with mean reciprocal dilutions for the 1-dose regimens of  $3.2 \times 10^4$  (10 µg) and  
121  $1.92 \times 10^4$  (0.2 µg), and 2-dose regimen responses of  $1.98 \times 10^5$  (10 µg) and  $1.35 \times 10^5$  (0.2 µg).  
122 Endpoint titers did not substantially wane between weeks 6 (Fig. 1c) and 8 (Supplemental Fig. 1a)  
123 or week 11 (Fig. 1c), indicating durability of binding antibody responses.

124

125 We then assessed the breadth of post-vaccination binding antibody responses following to WA1  
126 and VOCs B.1.1.7 and B.1.351 variant RBD antigens, measured by biolayer interferometry (Fig.  
127 1d). Responses again trended higher with the 2-dose regimen and did not differ between the 10

128  $\mu\text{g}$  and 0.2  $\mu\text{g}$  groups within regimens. Binding levels between strains were comparable between  
129 WA1 and B.1.1.7 in the 2-dose regimens with B.1.1.7/WA1 mean fold change ratios of 1.02 (10  
130  $\mu\text{g}$ ) and 1.01 (0.2  $\mu\text{g}$ ), while 1-dose group of B.1.1.7/WA1 ratios were 0.88 (10  $\mu\text{g}$ ) and 0.82 (0.2  
131  $\mu\text{g}$ ). Comparatively, B.1.351 cross-reactive binding antibody levels were reduced compared to  
132 WA1. B.1.351/WA1 mean fold-change ratios in the 2-dose groups were 0.71 (10  $\mu\text{g}$ ) and 0.49 (0.2  
133  $\mu\text{g}$ ), and in the 1-dose groups 0.29 (10  $\mu\text{g}$ ) and 0.14 (0.2  $\mu\text{g}$ ). Similar magnitude responses were  
134 observed at week 8 (Supplemental Fig. 1b), while binding antibody levels declined by week 11,  
135 the time of challenge (Fig 1e). Cross-reactive binding antibodies at week 6 also recognized  
136 heterologous B.1.1.7 and B.1.351 cell surface expressed spike protein in a flow cytometric based  
137 IgG opsonization assay; responses were consistent with the quantitative differences seen for the  
138 inter-group comparisons in Fig. 1 for all three strains (Supplemental Fig. 1c)

139

#### 140 **hACE2 competition and pseudovirus neutralizing antibody responses**

141 As SARS-CoV-2 mediates host cell entry via engagement of the viral spike protein with cell surface  
142 expressed human angiotensin-converting enzyme 2 (hACE2) protein, preventing this interaction  
143 is a critical target for vaccine induced immune responses<sup>26</sup>. We measured hACE2 inhibitory  
144 antibodies longitudinally using a serum competition assay that detects blockade of RBD-hACE2  
145 binding (Fig. 2a). At week 6, mean 50% inhibitory dilution (ID<sub>50</sub>) values in the 2-dose regimen  
146 groups were 145.6 (10  $\mu\text{g}$ ) and 106.8 (0.2  $\mu\text{g}$ ), and 76.6 (10  $\mu\text{g}$ ) and 57.0 (0.2  $\mu\text{g}$ ) in the 1-dose  
147 groups. Responses did not differ between regimens and were largely stable at week 8 but waned  
148 by the time of challenge at week 11.

149

150 Pseudovirus neutralizing antibody responses were measured against the WA1, B.1.1.7 and  
151 B.1.351 variants at weeks 6 and 11 (Fig. 2b and Fig. 2c, respectively). At week 6, responses were  
152 higher for the 2-dose versus the 1-dose vaccine regimen in most cases (Fig. 2b). Mean log<sub>10</sub> ID<sub>50</sub>  
153 values against WA1 ranged from 3.56 (10 µg) to 3.36 (0.2 µg) and 2.88 (10 µg) to 2.17 (0.2 µg) to  
154 WA1 in the 2-dose and one-dose regimens, respectively, with comparable titers against B.1.1.7  
155 of 3.90 (10 µg), 3.82 (0.2 µg), 2.52 (10 µg) and 2.36 (0.2 µg), respectively. Responses to B.1.351  
156 were diminished relative to WA1 and B.1.1.7, notably with the one-dose regimen, with mean  
157 log<sub>10</sub> ID<sub>50</sub> values of 3.46 (10 µg) to 2.74 (0.2 µg) and 1.67 (10 µg) to 1.68 (0.2 µg) in the 2-dose  
158 and 1-dose regimens, respectively. Titers were consistently higher for the 2-dose versus the 1-  
159 dose vaccine regimen. Neutralizing antibody responses decreased between weeks 6 and 11 and  
160 the differences between the 2-dose and 1-dose regimens were less marked (Fig. 2c).  
161 Interestingly, cross-neutralization was observed for some animals in the 2-dose regimen against  
162 the related sarbecovirus SARS-CoV-1, albeit at reduced levels compared to SARS-CoV-2. Here we  
163 demonstrate that SpFN-ALFQ vaccine induces potent neutralization in SARS-CoV-2 VOCs, as well  
164 as cross-neutralization against SARS-CoV-1, as previously described in rhesus macaques and  
165 mice<sup>18-20</sup>.

166

### 167 **Reduction of body-weight loss in SpFN-ALFQ vaccinated, VOCs challenged hamsters**

168 Hamsters were divided into two cohorts comprised of male and female animals and challenged  
169 with either B.1.1.7 (n=5) or B.1.351 (n=6) variants of SARS-CoV-2 by intranasal inoculation at  
170 week 11, 7 weeks after the last immunization in either the 2-dose or 1-dose vaccine regimen  
171 groups. Challenge doses were selected based on prior titration of viral stocks in hamsters,



172 targeting a 10-15% loss of body weight by 7 days post-challenge. Body weight was monitored  
173 daily following challenge. For both B.1.1.7 and B.1.351 infection, weight loss of PBS control  
174 animals fell as expected between 10-15% by 6 days post-challenge (DPC), with a mean weight  
175 loss of 11.6% for B.1.1.7 and 12.7% for B.1.351 respectively (Fig. 3a). For the 10 µg 2-dose  
176 vaccinated animals, B.1.1.7 challenged animals had a mean body weight loss of 2.3% and B.1.351  
177 challenged animals with slightly higher at 4.0%, but still a dramatic reduction from the PBS  
178 vaccinated control hamsters. In the 2-dose vaccine regimen groups, both the 10 µg and 0.2 µg  
179 dose groups demonstrated comparable levels of protection, with the one-dose vaccinated  
180 animals demonstrating the least protection both for B.1.1.7 and B.1.351 challenges.

181

182 **Undetectable lung and nasal tissue viral load in SpFN-ALFQ vaccinated, viral challenged**  
183 **hamsters**

184 To assess the impact of SpFN immunization following challenge by either the B.1.1.7 or B.1.351  
185 strains, viral load was assessed by viral culture recovery in lung tissues at day 6 post challenge  
186 (Fig. 3b). The mean viral load in the PBS vaccinated control animals challenged with B.1.1.7 was  
187  $5.67 \times 10^6$  TCID<sub>50</sub>/gram of lung tissue. Virus was not recovered in lung tissue culture in both the  
188 10 and 0.2 µg 2-dose and 1-dose vaccine groups (below the limit of detection of  $1.78 \times 10^3$ ) (Fig.  
189 3b). The mean lung tissue viral load in the PBS control vaccinated animals challenged with B.1.351  
190 was  $1.36 \times 10^7$  TCID<sub>50</sub>/g. All animals in the 2-dose and 1-dose vaccine groups, for both 10 µg and  
191 0.2 µg doses, showed no detectable virus except for one animal in the 10 µg two-dose vaccinated  
192 group (Fig. 3b). Viral load was also measured in nasal turbinate tissue collected at day 6 post-  
193 challenge, with similar results to lung tissue analysis (Fig. 3c). The mean nasal turbinate tissue

194 viral load in the PBS control vaccinated animals challenged with B.1.1.7 was  $1.39 \times 10^6$  TCID<sub>50</sub>/g  
195 and B.1.351 was  $8.14 \times 10^6$  TCID<sub>50</sub>/g of nasal turbinate, respectively. All vaccinated animals were  
196 below the limit of detection ( $1.492 \times 10^3$  TCID<sub>50</sub>/g), except a single outlier animal in the 0.2 µg 1-  
197 dose vaccination regimen group for B.1.1.7 challenged group, and an outlier animal each in the  
198 10 µg 2-dose and 0.2 µg 1-dose regimen vaccination groups for B.1.351 challenged animals (Fig.  
199 3c). Throughout the challenge phase of the study, oral swabs were collected at days 2, 4 and 6  
200 post-challenge and assessed for viral burden by RT-qPCR, by measuring both sub-genomic E  
201 messenger RNA (sgmRNA) (Supplemental Fig. 2a and 2c) and total viral RNA (viral load)  
202 (Supplemental Fig. 2b and 2d). Overall viral loads decreased modestly over the duration of the  
203 challenge in all groups for both B.1.1.7 and B.1.351, with the largest decrease observed at day 6  
204 post-challenge in the 2-dose 10 µg dose vaccination regimen group. These results demonstrate  
205 clear protection from tissue viral load in vaccinated animals challenged with B.1.1.7 and B.1.351,  
206 a critical determinant in establishing effective vaccines against SARS-CoV-2 VOCs.

207

#### 208 **Lung pathology and tissue nucleocapsid antigen are minimized by SpFN-ALFQ vaccination**

209 Lung pathology was assessed day 6 post-challenge by both routine hematoxylin and eosin (H&E)  
210 staining as well as immunohistochemistry (IHC) for the presence of viral nucleocapsid (N) protein  
211 (Fig. 4). By semiquantitative scoring of lung histopathology, the highest degree of pathology was  
212 seen in the PBS vaccinated control animals challenged with either B.1.1.7 or B.1.351 (Fig. 4a). All  
213 PBS vaccinated control animals developed histopathologic evidence of multifocal to extensive,  
214 moderate to marked interstitial pneumonia (IP) (Fig. 4b and 4c, for B.1.1.7 and B.1.351 challenged  
215 animals, respectively). The pneumonia was characterized by type II pneumocyte hyperplasia,

216 alveolar edema, alveolar inflammatory and necrotic debris, thickening of alveolar septae,  
217 bronchiolar epithelial hyperplasia, and increased numbers of pulmonary macrophages (including  
218 multinucleated giant cells). The extent of IP present in PBS vaccinated control animals was  
219 comparable in animals challenged with either B.1.1.7 or B.1.351. In the B.1.1.7 challenged  
220 animals, the least amount of pathology was seen in the animals vaccinated with either 2-dose  
221 regimen, although less pathology was evident in all of the SpFN vaccination groups compared  
222 with the PBS control group (Fig. 4a - left panel, 4b, 4c and Supplemental Table 1A). For the B.1.351  
223 challenged animals, the most protection from lung pathology was observed in the 10 µg, 2-dose  
224 vaccine regimen group, although there was a decrease in the mean pathology score of all SpFN  
225 vaccinated groups (Fig 4a - right panel, 4b, 4c and Supplemental Table 1A). Overall, there was a  
226 trend toward increased pathology observed in the B.1.351 versus the B.1.1.7 animals, in  
227 particular with the 1-dose groups. In the 10 µg 2-dose group however, protection between VOCs  
228 were comparable. Immunohistochemistry demonstrated strong, multifocal to focally extensive  
229 (>500-1000 cells per section) immunopositivity to SARS-CoV-2 nucleocapsid (N) protein in  
230 bronchiolar epithelium, alveolar pneumocytes and pulmonary macrophages in the lungs of all  
231 unvaccinated animals. Viral antigen detected in lung sections from animals in the 10 µg and 0.2  
232 µg vaccine groups was substantially reduced compared with the PBS vaccinated groups with the  
233 greatest reduction seem in the 10 µg 2-shot vaccine groups (Supplemental Table 1B). Taken  
234 together, SpFN adjuvanted with ALFQ confers clear protection from viral burden and pathology  
235 in the lungs following VOC challenge.

236

237 **Discussion**

238 The development of effective and safe vaccines in response to the SARS-CoV-2 pandemic has  
239 occurred at an unprecedented rate. This success has been tempered by the reduced vaccine  
240 efficacy against some emerging VOCs, most notably B.1.351<sup>4,5,8,11,13,16,27</sup>. The need for more  
241 broadly effective vaccines against multiple lineages of SARS-CoV-2 will likely increase, as  
242 underscored by the rapid rise of VOCs in India, including B.1.1.7 and emerging variants B.1.617  
243 with derivative lineages, and B.1.618<sup>3</sup>. As B.1.1.7 has become the dominant variant in the U.S.<sup>28</sup>  
244 and B.1.351 and B.1.617 lineages are becoming more dominant in many areas of the world,  
245 evaluation of existing and novel vaccines against these strains is essential. As the pandemic  
246 continues, SARS-CoV-2 will not only adapt to replicate more efficiently in the human host and  
247 evolve to escape host immune responses to natural infection, it will increasingly adapt to vaccine  
248 evoked immune responses. This large number of products administered globally, with differential  
249 vaccine efficacy, will further drive the evolution of virus variants that may be more resistant to  
250 current formulations of SARS-CoV-2 vaccines. This will be especially true in populations where  
251 immunocompromised individuals are prevalent (e.g., HIV infection, cancer therapies, organ  
252 transplant, autoimmune diseases) providing an ideal milieu for the generation of virus variants  
253 to challenge current and next generation SARS-CoV-2 vaccines<sup>29</sup>.

254

255 We evaluated the efficacy of a novel vaccine, currently in clinical trials (ClinicalTrials.gov  
256 Identifier: NCT04784767), against VOCs. SpFN adjuvanted with ALFQ, has been previously  
257 demonstrated to be highly efficacious against the WA1 strain of SARS-CoV-2 in nonhuman  
258 primate and murine models<sup>17,18,20</sup>. In this study, sera from hamsters that were immunized at 10  
259  $\mu\text{g}$  and 0.2  $\mu\text{g}$  doses as 1- and 2-dose regimens demonstrated dose-dependent binding,

260 neutralizing and hACE2 inhibiting antibody activity, with the highest responses seen in the 2-dose  
261 regimens. The strongest responses against WA1, B.1.1.7 and B.1.351 were observed in the 10 µg  
262 group using a 2-dose regimen, with similar binding responses observed between WA1 and  
263 B.1.1.7, that were reduced slightly against B.1.351 in the 10 µg, 2-dose regimen but more  
264 substantially in the 1-dose regimens. Humoral immunity waned from peak responses at study  
265 weeks 6 and 8 to the time of challenge at week 11. Opsonizing IgG responses, shown to be  
266 associated with protection against SARS-CoV-2 in small-animal models, were also elicited<sup>30-34</sup>.  
267 Additionally, prior studies have demonstrated that vaccine-induced antibody Fc-mediated  
268 functions are also associated with protection against SARS-CoV-2<sup>35-37</sup>. Here, we demonstrated  
269 that the SpFN vaccine was able to elicit high IgG opsonization against both wild type and VOCs in  
270 hamsters, suggesting that SpFN-ALFQ vaccine induced antibodies that could leverage Fc-  
271 mediated functions associated with protection from SARS-CoV-2 VOCs to include B.1.351. Of  
272 note, we observed strong neutralizing responses in the 10 µg, 2-dose regimen groups that were  
273 similar across WA1, B.1.1.7 and B.1.351 variants. This is particularly encouraging as many studies  
274 have demonstrated decreased neutralizing antibody responses of convalescent or vaccinee sera,  
275 in particular against B.1.351<sup>4,11,14,16,27</sup>. hACE2-RBD binding inhibition levels mirrored overall  
276 humoral responses. This assay has functional implications for cellular entry and in conjunction  
277 with the binding and neutralization assays, will be critical to utilize in future studies to understand  
278 the critical correlates of protection conferred during SpFN-ALFQ vaccination in SGH and NHP  
279 models.  
280

281 As expected from the humoral responses, mitigation of body weight loss was also observed in  
282 vaccinated animals, following SARS-CoV-2 VOC challenge, most dramatically in the 2-dose  
283 vaccinated animals. Hamsters were challenged with doses of B.1.1.7 or B.1.351 targeted to result  
284 in a 10-15% loss of body weight in control animals. In the 2-dose regimen at both 10  $\mu$ g and 0.2  
285  $\mu$ g doses for B.1.1.7, loss of bodyweight was dramatically reduced, from ~12% observed in the  
286 PBS control animals to between 2-3% in the vaccinated groups. Notably, a single vaccination in  
287 the 10  $\mu$ g dose group was also sufficient to confer similar protection, with the even low-dose  
288 conferring intermediate levels of protection after a single immunization. In the case of B.1.351,  
289 protection in the prime-boost regimen had a similar range of protection, from the ~13%  
290 bodyweight loss observed in the PBS treated animals to 3-4%. Single-doses were less protective  
291 than observed for B.1.1.7 challenge, but still conferred intermediate protection against B.1.351  
292 challenge. These results are highly encouraging, showing potential protective efficacy of the  
293 SpFN-ALFQ vaccine against clinical disease caused by VOC to include B.1.351, particularly using a  
294 2-dose regimen.

295

296 Following the challenge phase of the study, assessment of viral loads by TCID50 in lung tissues  
297 and nasal turbinate demonstrated clear protection from challenge with either B.1.1.7 or B.1.351,  
298 with complete elimination of recoverable virus detected in the majority of animals, regardless of  
299 vaccine regimen, by day 6 post challenge. Adjunctive analysis of oral swab viral load, either total  
300 RNA or subgenomic mRNA, products of discontinuous SARS-CoV-2 transcription only seen during  
301 active viral replication, confirmed the lung and nasal turbinate tissue viral culture data in showing  
302 virologic evidence of SpFN-ALFQ protection with either B.1.1.7 or B.1.351 challenge.

303

304 A key question that this study was designed to address through the utilization of SGH as a  
305 pathogenic model of SARS-CoV-2 disease, was whether SpFN-ALFQ had an impact on lung  
306 pathology developed during acute infection with B.1.1.7 or B.1.351. Challenge doses of B.1.1.7  
307 and B.1.351 utilized in this study gave nearly equivalent pathology in unvaccinated (PBS) control  
308 animals, with significant type II pneumocyte hyperplasia and cellular infiltrate occurring within  
309 the lung on H&E, and viral staining observed by detection of viral nucleocapsid (N) protein by  
310 immunohistochemistry. For B.1.1.7 challenged animals, pathology was dramatically reduced in  
311 both the high and low-dose prime-boost groups. 1-dose 10 µg and 0.2 µg vaccine regimens  
312 conferred intermediate levels of protection, with wider variability in individual pathology within  
313 individuals. In the B.1.351 challenged animals, the 10 µg 2-dose vaccine regimen also  
314 demonstrated decreases in pathology compared with the cognate PBS control, with intermediate  
315 levels of protection conferred to the 0.2 µg groups. Taken together, SpFN-ALFQ generated robust  
316 binding antibody and neutralizing antibody responses in SGH against WA1, B.1.1.7 and B.1.351  
317 SARS-CoV-2 variants. It was also protective in intranasal challenge with the B.1.1.7 and B.1.351  
318 variants as assessed by body weight preservation, lung tissue viral load, oral fluid total and  
319 sgmRNA, and standard histopathological and immunohistochemical analysis of lung tissues at  
320 necropsy.

321

322 Publically available preprint reports have recently shown that the vaccines being marketed by  
323 AstraZeneca, ChAdOx1 nCoV-19 (AZD1222), and Moderna, mRNA-1273, show protection against  
324 B.1.351 challenge in hamster and rhesus models, respectively<sup>27,38</sup>. Another preprint describes

325 protection from B.1.351 challenge in human ACE2 transgenic mice vaccinated with the CureVac  
326 mRNA vaccine, CVnCoV<sup>39</sup>. Continued molecular epidemiologic analysis of ongoing SARS-CoV-2  
327 infections with concomitant assessment of the impact of emerging VOCs on current and next-  
328 generation SARS-CoV-2 vaccines will be essential for achieving and maintaining pandemic  
329 control, and underpins the scientific approach to both pan-SARS-CoV-2 and pan-coronavirus  
330 vaccine research and development. To this end, SpFN-ALFQ is now being evaluated in a first in  
331 human phase I clinical trial as a platform approach toward broader application to the  
332 betacoronavirus genus and the entire family of coronaviruses.

333

## 334 **Methods**

335

### 336 **Transfection, Expression and Purification of SpFN 1B-06-PL**

337 Expi293 cells (Gibco, Cat No. A14527) were maintained and passaged as per manufacturer's  
338 guidelines in Expi293 Expression Media (Gibco, Cat No. A1435101) at 37°C, 8% CO<sub>2</sub>, 120 RPM, ≥  
339 60% RH. Briefly, the transfection reaction consisted of 1mg of purified, cGMP sourced plasmid  
340 DNA (Aldevron, pCoV 1B-06-PL) plus 3mL of Turbo 293 Transfection Reagent (Speed Biosystems,  
341 Cat No. PXX1001) mixed in 1X PBS per liter of transfected cells. The reaction was incubated at 20-  
342 25°C for 15 minutes and 125mL/flask was rapidly and aseptically transferred to 16 single use 3L  
343 Erlenmeyer shake vented flasks (Corning, Cat no. 431252) each containing 1.125L of Expi293 cells  
344 passaged at a density of 2.0 x 10<sup>6</sup> cells/ml on the day of transfection. After the addition of the  
345 transfection reaction, the transfected cells were incubated at 34°C, 8% CO<sub>2</sub>, 120 RPM, ≥ 60% RH  
346 for 5 days. The expressed product was collected, clarified by double centrifugation at 4000 RPM,



347 10°C, for 30 minutes, followed by depth filtration (0.65µM + 0.45µM, Sartorius, Sartobran P, Cat  
348 No. 5235306D0-SO-V) and stored at 2-8°C for further downstream processing.

349

350 SpFN 1B-06 PL was purified, concentrated and dialyzed against 50 mM Tris, 50mM NaCl, pH 8.0  
351 solution. Briefly, 16 L of clarified expression product was initially concentrated 6 fold using a  
352 tangential flow filtration module (500 kD MW Cutoff, mPES MiniKros, Cat No.N04-500-05). The  
353 concentrate was treated with Benzonase (EMD Millipore, Cat No.EM1.01695.0001) for 120min  
354 at 22°C before conducting a buffer exchange into 50 mM Tris, 50mM NaCl, pH 7.915. The material  
355 was loaded onto a 4.4 x 14 cm Fractogel DEAE (M) Column (EMD Millipore, Cat No.1168835000)  
356 with a bed volume of 212 mL. SpFN 1B-06 PL bound to the column and was eluted with 50 mM  
357 Tris Base, 200 mM NaCl, pH 8.018, 21.55 mS/cm. Following this, a 44 mL Capto Core 400 column  
358 (Cytiva, Cat No.17372403) was used as a polishing step to remove any potential lower MW  
359 contaminants. A final dialysis step was performed to place the product into the final formulation  
360 buffer using a 300 kD MWCO UF cartridge (Repligen mPES MiniKros, Cat No. S02-E300-05). The  
361 final purified SpFN 1B-06 PL recovery yielded 55.47 mg in a volume of 215 mL, approximately a  
362 3.47 mg/L yield from the cell expansion and growth.

363

#### 364 **Viral stock propagation and preparation**

365 B.1.1.7 viral stocks were generated from seed stock (USA/CA\_CDC\_5574/2020), obtained from  
366 BEI resources (Cat # NR-54011, Lot # 70041598) and expanded in Calu-3 cells (incubated at 37°C  
367 for 3 days). The viral stock lot used for this study (Lot # 012921-1230) was titrated in Vero-  
368 TMPRSS2 cells, with viral titers of  $1.375 \times 10^6$  PFU/mL. This stock was used undiluted for viral

369 challenge with 100 $\mu$ L intranasally, for a final challenge concentration of  $1.375 \times 10^5$  PFU/mL per  
370 dose.

371

372 B.1.351 viral stocks were propagated and characterized by deep sequencing as previously  
373 described<sup>38</sup>. Briefly, hCoV-19/USA/MD-HP01542/2021 (B.1.1.351) was derived from the seed  
374 stock (Lot# MD-HP JHU P2) and propagated in in VeroE6-TMPRSS2 cells. The viral titer of the  
375 B.1.351 stock used for this study was  $3 \times 10^7$  PFU/ml in VeroE6-TMPRSS2 cells, diluted 1:100 in  
376 PBS for a challenge dose of  $3 \times 10^4$  PFU in 100 $\mu$ L.

377

### 378 **Syrian golden hamster immunizations**

379 Male and female Syrian golden hamsters (6-8 week-old, n = 55) were acquired from Charles River  
380 Laboratories and housed at Bioqual, Inc., for the duration of the study. Following one week of  
381 acclimatization, animals were immunized intramuscularly in caudal thighs with PBS (control) or  
382 SpFN immunogen of differing doses (10  $\mu$ g or 0.2  $\mu$ g) pre-formulated with a fixed dose of ALFQ  
383 (20  $\mu$ g of 3D-PHAD (monophosphoryl 3-deacyl lipid A (synthetic)) and 10  $\mu$ g of QS21)<sup>40</sup>. The  
384 design, production, stability, and initial characterization of SpFN adjuvanted with ALFQ has been  
385 described previously<sup>20</sup>. Briefly, the immunogen is based on the Spike protein of the WA1 SARS-  
386 CoV-2 variant with S-2P amino acid modifications expressed as a fusion protein with H. pylori  
387 ferritin in mammalian cells that self-assembles into an ordered nanoparticle each of which  
388 presents 8 Spike trimers. SpFN was formulated with ALFQ prior to administration. SpFN was  
389 produced at the WRAIR Pilot Bioproduction Facility in October 2020 as an engineering batch and  
390 stored at 4°C for 3-4 months for the prime and boost/single immunization doses, respectively.

391 Boosting immunizations were injected contralaterally from the prime four weeks following the  
392 prime. In-life blood sampling was conducted by retro-orbital bleeds. Maximum blood collections  
393 were determined based on animal weight and frequency of collection, in consultation with  
394 veterinary guidance. Following collections, animals were monitored until fully recovered from  
395 the anesthetic and the procedure.

396

### 397 **SARS-CoV-2 Syrian golden hamster challenge**

398 Animals were challenged with SARS-CoV-2 seven weeks following the boost or single  
399 immunization. Animals were anesthetized with ketamine/xylazine and challenged by intranasal  
400 inoculation of 50  $\mu$ L virus in each nostril in a drop-wise manner (100 $\mu$ L/hamster). Challenge dose  
401 was pre-determined for each VOC viral stock to achieve comparable clinical disease as manifested  
402 by body weight loss of 10-15%. B.1.1.7 virus was administered at a challenge dose of  $1.375 \times 10^5$ .  
403 B.1.351 virus was administered at a challenge dose of  $3 \times 10^4$  PFU per hamster. Following viral  
404 challenge, all animals were weighted and observed twice daily for clinical signs (ruffled fur,  
405 hunched posture, behavior, etc.), with euthanasia criteria of 20% loss of pre-challenge body  
406 weight or becoming moribund. At study termination 6 DPC, all animals were terminally  
407 anesthetized by ketamine/xylazine, followed by exsanguination by cardiac puncture (for terminal  
408 blood collection) and euthanasia. Tissues were collected for use in downstream virologic,  
409 immunologic, molecular and histopathology studies. Animals were housed in BLS-2 during the  
410 vaccination phase and BSL-3 facilities during the challenge phase.

411

### 412 **Enzyme Linked Immunosorbent Assay (ELISA)**

413 96-well Immulon “U” Bottom plates were coated with 1 µg/mL of RBD or S protein (S-2P) antigen  
414 in Dulbecco’s PBS, pH 7.4. Plates were incubated at 4°C overnight and blocked with blocking  
415 buffer (PBS containing 0.5% Casein and 0.5% BSA, pH 7.4), at room temperature (RT) for 2 h.  
416 Individual serum samples were serially diluted 2-fold in blocking buffer and added to triplicate  
417 wells and the plates were incubated for 1 hour at RT. The plates were washed with PBS containing  
418 0.1% Tween 20, pH 7.4, followed by the addition of horseradish peroxidase (HRP)-conjugated  
419 goat anti-Hamster IgG (H+L) (1:2000 dilution) (SouthernBiotech) for an hour at RT. The HRP  
420 substrate, 2,2'-Azinobis [3-ethylbenzothiazoline-6-sulfonic acid]-diammonium salt (ABTS) (KPL)  
421 was added to the plates for 1 hour at RT. The reaction was stopped by the addition of 1% SDS per  
422 well and the absorbance (A) was measured at 405 nm (A405) using an ELISA reader Spectramax  
423 (Molecular Devices, San Jose, CA) within 30 min of stopping the reaction. The results are  
424 expressed as end point titers, defined as the reciprocal dilution that gives an absorbance value  
425 that equals twice the background value (antigen-coated wells that did not contain the test sera,  
426 but had all other components added).

427

#### 428 **Biolayer Interferometry RBD binding assay**

429 All biosensors were hydrated in PBS prior to use. All assay steps were performed at 30°C with  
430 agitation set at 1,000 rpm in the Octet RED96 instrument (FortéBio). HIS1K biosensors (FortéBio)  
431 were equilibrated in assay buffer (PBS) for 30 seconds before loading of His-tagged SARS-CoV-2  
432 WA1 RBD or VOC RBDs B1.1.7, and B.1.351 (30 µg/mL diluted in PBS) for 120 seconds.  
433 Immobilized RBD proteins were then dipped in hamster sera (100x dilution with PBS) for 180  
434 seconds followed by dissociation for 60 seconds. Binding response values were recorded at 180

435 seconds. SARS-CoV-2 RBD constructs (residues 331 - 527), modified to incorporate a N-terminal  
436 hexa-histidine tag (for purification), were derived from the Wuhan-Hu-1 strain genome  
437 sequence (GenBank MN9089473) and synthesized and subcloned into a CMVR plasmid by  
438 Genscript. RBD with VOC point mutations were generated using a modified QuikChange site-  
439 directed mutagenesis protocol (Agilent). The constructs resulting from site-directed mutagenesis  
440 were amplified and isolated from *E. coli* Stbl3 or Top10 cells. Large-scale DNA isolation was  
441 performed using either endo free Maxiprep, Megaprep or Gigaprep kits (Qiagen). All expression  
442 plasmids were transiently transfected into Expi293F cells (Thermo Fisher Scientific) using  
443 ExpiFectamine 293 transfection reagent (Thermo Fisher Scientific). Cells were grown in  
444 polycarbonate baffled shaker flasks at 34°C and 8% CO<sub>2</sub> at 120 rpm. Cells were harvested 5-6 days  
445 post-transfection via centrifugation at 3,500 x g for 30 minutes. Culture supernatants were  
446 filtered with a 0.22-µm filter and stored at 4°C prior to purification. His-tagged RBD proteins were  
447 purified using Ni-NTA affinity chromatography, with 1 mL Ni-NTA resin (Thermo Scientific) used  
448 to purify protein from 1L of expression supernatant. Ni-NTA resin was equilibrated with 5 column  
449 volumes (CV) of phosphate buffered saline (PBS) (pH 7.4) followed by supernatant loading 2 x at  
450 4°C. Unbound protein was removed by washing with 200 CV of PBS, followed by 50 CV 10mM  
451 imidazole in PBS. Bound protein was eluted with 220 mM imidazole in PBS. All proteins were  
452 further purified by size-exclusion chromatography using a 16/60 Superdex-200 purification  
453 column. Purification purity for all the proteins was assessed by SDS-PAGE.

454

455 **Biolayer Interferometry hACE2 competition assay**

456 All biosensors were hydrated in PBS prior to use. All assay steps were performed at 30°C with  
457 agitation set at 1,000 rpm in the Octet RED96 instrument (FortéBio). SARS-CoV-2 RBD - hACE2  
458 competition assays were carried out as follows. SARS-CoV-2 RBD (WA1 strain, 30 µg/ml diluted  
459 in PBS) was immobilized on HIS1K biosensors (FortéBio) for 180 seconds followed by baseline  
460 equilibration for 30 seconds. Serum binding was allowed to occur for 180 seconds followed by  
461 baseline equilibration (30 seconds). Recombinant hACE2 protein (30 µg/ml) was then allowed to  
462 bind for 120 seconds. Percent inhibition (PI) of hACE2 binding to the RBD by serum was  
463 determined using the equation:  $PI = 100 - ((\text{hACE2 binding in the presence of mouse serum} /$   
464  $\text{hACE2 binding in the absence of mouse serum}) \times 100)$ .

465

#### 466 **IgG Opsonization Assays**

467 SARS-CoV-2 S-expressing expi293F cells were generated by transfection with linearized plasmid  
468 (pcDNA3.1) encoding codon-optimized full-length SARS-CoV-2 S protein matching the amino acid  
469 sequence of the IL-CDC-IL1/2020 isolate (GenBank ACC# MN988713), the B.1.1.7 isolate<sup>9</sup>, or the  
470 B.1.351 isolate<sup>41</sup>. Stable transfectants were single-cell sorted and selected to obtain a high-level  
471 Spike surface expressing clone (293F-Spike-S2A). 293F-Spike-S2A cells were incubated with 100  
472 µl of plasma diluted 100-fold in RPMI containing 10% FBS (R10) for 30 minutes at 37°C. Cells were  
473 washed 3 times and stained with a goat anti-hamster IgG (H+L) Alexa Fluor 488 (ThermoFisher  
474 Scientific). Cells were then fixed with 4% formaldehyde solution and fluorescence was evaluated  
475 on a LSRII analytic cytometer (BD Bioscience).

476

#### 477 **SARS-CoV-1 and SARS-CoV-2 pseudovirus neutralization assay**

478 Pseudovirions were produced by co-transfection of HEK293T/17 cells with either the SARS-CoV-  
479 1 (Sino 1-11, GenBank # AY485277) or SARS-CoV-2 (WA1/2020 GenBank # MT246667) S  
480 expression plasmid and an HIV-1 pNL4-3 luciferase reporter plasmid (pNL4-3.Luc.R-E-, NIH AIDS  
481 Reagent Program). The S expression plasmid sequences for SARS-CoV-2 and SARS-CoV-1 were  
482 codon optimized and modified to remove an 18 amino acid endoplasmic reticulum retention  
483 signal in the cytoplasmic tail in the case of SARS-CoV-2, and a 28 amino acid deletion in the  
484 cytoplasmic tail in the case of SARS-CoV-1 to improve S incorporation into pseudovirions and  
485 improve infectivity. S expression plasmids for SARS-CoV-2 VOC were similarly codon optimized,  
486 modified and included the following mutations: B.1.1.7 (69-70del, Y144del, N501Y, A570D,  
487 D614G, P681H, T718I, S982A, D1118H), B.1.351 (L18F, D80A, D215G, 241-243del, K417N, E484K,  
488 N501Y, D614G, A701V, E1195Q). Virions pseudotyped with the vesicular stomatitis virus (VSV) G  
489 protein were used as a non-specific control. Infectivity and neutralization titers were determined  
490 using ACE2-expressing HEK293 target cells (Integral Molecular). Test sera were diluted 1:40 in  
491 cell culture medium and serially diluted; then 25  $\mu$ L/well was added to a white 96-well plate. An  
492 equal volume of diluted SARS-CoV-2 PSV was added to each well and plates were incubated for  
493 1 hour at 37°C. Target cells were added to each well (40,000 cells/ well) and plates were  
494 incubated for an additional 48 hours. Relative light units (RLU) were measured with the EnVision  
495 Multimode Plate Reader (Perkin Elmer, Waltham, MA) using the Bright-Glo Luciferase Assay  
496 System (Promega, Madison, WI). Neutralization dose–response curves were fitted by nonlinear  
497 regression using the LabKey Server. Final titers are reported as the reciprocal of the dilution of  
498 serum necessary to achieve 50% (ID<sub>50</sub>, 50% inhibitory dose). Assay equivalency for SARS-CoV-2  
499 was established by participation in the SARS-CoV-2 Neutralizing Assay Concordance Survey

500 (SNACS) run by the Virology Quality Assurance Program and External Quality Assurance Program  
501 Oversight Laboratory (EQAPOL) at the Duke Human Vaccine Institute, sponsored through  
502 programs supported by the National Institute of Allergy and Infectious Diseases, Division of AIDS.  
503

#### 504 **Oral cavity viral RNA measurements**

505 The oral cavity was swabbed with a sterile flocked swab that was immediately placed into a  
506 cryovial with 1mL PBS. Vials were snap-frozen on dry ice and stored at -80°C until testing. Viral  
507 RNA was extracted from 200 ul of oral swab material using the Qiagen EZ1 DSP Virus kit on the  
508 automated EZ1 XL Advance instrument (Qiagen, Valencia, CA). Real-time quantitative reverse  
509 transcription – polymerase chain reactions (RT-qPCR) were performed on the 7500 Dx Fast  
510 thermal cycler (Thermo Fisher Scientific, Life Technologies, Carlsbad, CA). SARS-CoV-2 specific  
511 forward and reverse primers and probe targeting the E gene encoding the envelope protein were  
512 used for amplification of the viral RNA. Amplification of the sgRNA was achieved using the  
513 Leader TRS sequence specific primer, the reverse E primer and the E specific probe as described  
514 previously<sup>18</sup>. A synthetic RNA for subgenomic E was used as a calibrator. Final results were  
515 reported in copies/ml.

516

#### 517 **Tissue viral burden by TCID50**

518 The infectious titer determination from lungs and nasal turbinates was obtained by performing  
519 a TCID50 assay. Vero TMPRSS2 cells were plated at 25,000 cells per well in DMEM  
520 supplemented with 10% FBS and gentamicin. Cells were incubated at 37°C, 5.0% CO<sub>2</sub>. When  
521 cells achieved 80-100% confluency, the media was aspirated and replaced with 180µL of DMEM



522 containing 2% FBS and gentamicin. 0.10-0.20 mg sections of the right lobe of the lung and the  
523 nasal turbinates were collected at necropsy, snap frozen, and stored at -80°C until processing.  
524 Frozen tissue was placed in 15 mL conical tube on wet ice containing 0.5 mL media and  
525 homogenized 10-30 secs (Probe, Omni International: 32750H). The tissue homogenate was  
526 spun to remove debris at 2000 *g*, 4°C for 10 min. The supernatant was then passed through a  
527 strainer (Pluriselect: Cat No. 43-10100-40) into the original vial and kept on wet ice. From the  
528 strained supernatant, 20 µL aliquots were tested in quadruplicate in a 96-well plate format. The  
529 top row of the 96-well plate was mixed 5 times and serially diluted by pipette transfer of 20 µL,  
530 representing 10-fold dilutions. Pipette tips were disposed of between each row and mixing was  
531 repeated until the last row on the plate. After incubation for 4 days, wells were visually  
532 inspected for cytopathic effects (CPE) scored as CPE minus (-) where non-infected wells have a  
533 clear confluent cell layer, or CPE plus (+), where rounding of infected cells is observed. Positive  
534 controls were utilized for optimal assay performance, where the TCID<sub>50</sub> tested within 2-fold of  
535 the expected value. TCID<sub>50</sub> of all samples were calculated using the Read-Muench formula.

536

### 537 **Histology and immunohistochemistry**

538 Lungs from 6 DPC were insufflated and perfused with 10% neutral-buffered formalin. Three  
539 tissue sections from each of the left lung lobes were used to evaluate the lung  
540 pathology. Sections were processed routinely into paraffin wax, then sectioned at 5 µm, and  
541 resulting slides were stained with hematoxylin and eosin. Immunohistochemistry (IHC) on  
542 formalin fixed paraffin embedded tissue sections was performed using the Dako Envision system  
543 (Dako Agilent Pathology Solutions, Carpinteria, CA, USA). Briefly, after deparaffinization,

544 peroxidase blocking, and antigen retrieval, sections were stained with an anti-SARS-CoV/SARS-  
545 COV-2 nucleocapsid (N) protein rabbit monoclonal antibody (#40143-R001, Sino Biological,  
546 Chesterbrook, PA, USA) at a dilution of 1:6000 and incubated at RT for 45 min. Sections were  
547 rinsed and stained with peroxidase-labeled polymer (secondary antibody) for 30 min. Slides were  
548 rinsed and a brown chromogenic substrate 3,3' Diaminobenzidine (DAB) solution (Dako Agilent  
549 Pathology Solutions) was applied for 8 min. Slides were rinsed, counterstained with hematoxylin,  
550 and rinsed. The sections were dehydrated, cleared with Xyless II, and cover-slipped. All tissue  
551 slides were evaluated by a board-certified veterinary anatomic pathologist blinded to study  
552 group allocations. Semi-quantitative scoring of pulmonary pathology was performed, with  
553 grading of intra-alveolar edema, type II pneumocyte hyperplasia, mononuclear cellular infiltrates,  
554 polymorphonuclear cellular infiltrates, alveolar histiocytosis, alveolar necrosis, bronchioalveolar  
555 epithelial degeneration, bronchiolar epithelial hyperplasia, and interstitial collagenous  
556 deposition. Each finding was scored as follows: 0 - absent, 1 - minimal (<10% of tissue section  
557 affected); 2 - mild (11-25% of tissue section affected); 3 - moderate (26-50% of tissue section  
558 affected); 4 - marked (51-75% affected); 5- severe (>75% of tissue section affected). IHC sections  
559 were examined at 400X magnification and evaluated for the number of immunopositive cells per  
560 slide.

561

## 562 **Ethical Statement**

563 All animal *in vivo* procedures were carried out in accordance with institutional, local, state, and  
564 national guidelines and laws governing research in animals including the Animal Welfare Act.  
565 Animal protocols and procedures were reviewed and approved by the Animal Care and Use

566 Committee of both the US Army Medical Research and Development Command (USAMRDC)  
567 Animal Care and Use Review Office as well as the Institutional Animal Care and Use Committee  
568 of Bioqual, Inc. (protocol number 20-144). Bioqual, Inc. and the USAMRDC are accredited by the  
569 Association for Assessment and Accreditation of Laboratory Animal Care and are in full  
570 compliance with the Animal Welfare Act and Public Health Service Policy on Humane Care and  
571 Use of Laboratory Animals. Oversight of all research was approved and conducted by the  
572 WRAIR Institutional Biological Safety Committee.

573

#### 574 **Statistical Analysis**

575 All statistical analysis were performed using GraphPad Prism version 8 software. All statistical  
576 tests shown were performed using the Kruskal-Wallis test with Dunn's correction, comparing all  
577 variables (multiple comparison analysis, not against a standard control). Actual p-values for  
578 each comparison annotated for statistically relevant values, or for values near statistical  
579 significance. All other not statistically or biologically relevant values reported as not-significant  
580 (ns). Comparisons to PBS control group are shown directly above each vaccine treatment  
581 condition (gray), with inter/intra vaccine regimen comparisons indicated by a solid line between  
582 groups, with the statistical result directly above (black).

583

## 584 **Figure Legends**

585 **Figure 1. Antibody responses following SpFN-ALFQ immunization. a,** The 3-dimensional model  
586 of SpFN with Spike protein trimers (green) decorating a ferritin core (gray) as viewed down a 3-  
587 fold axis. **b,** Experimental design with hamsters receiving immunization at weeks 0 and 4 in the  
588 2-dose regimen and week 4 in the 1-dose regimen as depicted by green SpFN structures above  
589 the time-line and check marks below the timeline indicating immunogen dose (10  $\mu$ g or 0.2  $\mu$ g  
590 or PBS control). Phlebotomy samples were taken at weeks 0, 6, 8 and 11 as indicated by red  
591 arrows. Intranasal (IN) viral challenge was performed at week 11 with either VOC B.1.1.7 or  
592 B.1.351 viral stocks with the number of animals challenged noted parenthetically. Oral swabs  
593 were collected at 2, 4, and 6 days post challenge (DPC) as indicated by blue arrows above the  
594 timeline. Necropsy was performed on all animals at day 6 post-challenge as indicated by the black  
595 arrow. **c,** ELISA was performed using either WA1 derived Receptor Binding Domain (RBD) or S-2P  
596 Spike proteins from sera taken at weeks 6 and 11. Sera from week 0 was also assessed, with no  
597 detectable signal observed in any samples (data not shown). The vaccine regimens are indicated  
598 on the x-axis by PBS (control) or SpFN dose with the number of vaccinations in the regimen given  
599 parenthetically and by color code (blue, 2-dose, red, 1-dose). Endpoint titers are given on the y-  
600 axis as geometric mean titers with data displayed in box plots with the top and bottom bars of  
601 the box the standard deviation and the middle bar as the median value. P-values for active  
602 vaccination groups compared with PBS control are given just above the boxes in light grey while  
603 intra-active regimen p-values are given above the boxes in black. ns, not significant ( $p > 0.05$ )  
604 using the Kruskal-Wallis multiple comparisons test, with Dunn's correction. **d,e,** Octet Biolayer  
605 Interferometry (BLI) responses against the WA1, B.1.1.7, and B.1.351 sequences of the RBD are

606 given for the vaccination regimens as in C on the x-axis at weeks 6 (**d**) and 11 (**e**). BLI responses  
607 are given in nanometers (nm) on the y-axis. Color coding and statistical treatments are as in **c**.

608

609 **Figure 2. Human angiotensin-converting enzyme competition and pseudovirus neutralization**

610 **responses following SpFN-ALFQ immunization. a,** Human angiotensin-converting enzyme

611 competition (hACE2) assays were performed from sera taken at week 6, 8, and 11. The vaccine

612 regimens are indicated on the x-axis by PBS (control) or SpFN dose with the number of

613 vaccinations in the regimen given parenthetically and by color code (blue, 2-dose, red, 1-dose).

614 Inhibitory dose 50% (ID50) are given on the y-axis as with data displayed in box plots with the top

615 and bottom bars of the box the standard deviation and the middle bar as the median value. P-

616 values for SpFN-ALFQ vaccination groups compared with PBS control are given just above the

617 boxes in light grey while intra-active regimen p-values are given above the boxes in black. ns, not

618 significant ( $p > 0.05$ ) using the Kruskal-Wallis multiple comparisons test, with Dunn's correction.

619 **b,c,** Pseudovirus neutralization at weeks 6 and 11 are given against Spike proteins derived from

620 WA1, B.1.1.7, B.1.351 SARS-CoV-2 variants and from SARS-CoV-1. The vaccine regimens are

621 indicated on the x-axis as in **a**. The neutralization titers are given as inhibitory dose 50% (ID50)

622 on the y-axis which is a logarithmic scale. The data are given as box plots and statistically treated

623 as described in **a**.

624

625 **Figure 3. Body weight changes and lung viral load post-challenge.** Daily weights were gathered

626 on hamsters from the time of viral challenge to necropsy on day 6 post challenge when lungs

627 were harvested for a whole tissue, culture based viral load assessment in Vero TMPRSS2 cells. **a,**

628 Mean percent body weight changes plus and minus standard error of the mean (SEM) are given  
629 on the y-axis for groups of hamsters assigned to phosphate buffered saline control (PBS) or SpFN-  
630 ALFQ vaccination from day of challenge (day 0) to day of necropsy (day 6) for either B.1.1.7 or  
631 B.1.351 challenge. Data from immunization groups are given in each graph as PBS (grey plot,  
632 phosphate buffered saline control) or active immunogen dose (blue circle/ blue solid line, 10  $\mu$ g  
633 2-dose regimen; black triangle/ blue dotted line, 0.2  $\mu$ g 2-dose regimen; red circle/red solid line,  
634 10  $\mu$ g 1-dose regimen; black triangle/red dotted line, 0.2  $\mu$ g 1-dose regimen. Number of  
635 vaccinations in the vaccine regimen are also given parenthetically within each graph. **b**, SARS-  
636 CoV-2 viral load data from lung tissue harvested on day 6 post challenge is given on the y-axis as  
637 the tissue culture infective dose, 50% (TCID<sub>50</sub>) per gram of tissue as titered on Vero TMPRSS2  
638 cells and read out by cytopathic effects for either B.1.1.7 and B.1.351 challenged hamsters.  
639 Immunization groups are given on the x-axis as PBS (phosphate buffered saline) control (gray  
640 circles); 10  $\mu$ g and 0.2  $\mu$ g 2-dose vaccine regimens (blue circles); 10  $\mu$ g and 0.2  $\mu$ g 1-dose vaccine  
641 regimens (red circles). Group data are plotted with the median group value given by the middle  
642 bar of the box plot. The dotted horizontal line is the lower limit of detection of the assay. **c**, SARS-  
643 CoV-2 viral load data from nasal turbinate tissue harvested on day 6 post challenge is given as in  
644 **b**. **b**, **c**, P-values for SpFN-ALFQ vaccination groups compared with PBS control are given just  
645 above the boxes in light grey while intra-active regimen p-values are given above the boxes in  
646 black. ns, not significant ( $p > 0.05$ ) using the Kruskal-Wallis multiple comparisons test, with  
647 Dunn's correction.

648

649 **Figure 4. Standard and immunohistopathologic examination post-challenge.** Lung tissues were  
650 collected at necropsy on day 6 post-challenge, fixed with neutral buffered formalin, and stained  
651 with hematoxylin and eosin (H&E) for standard microscopic examination as well as submitted  
652 for immunohistochemical (IHC) staining for SARS-CoV-2 nucleocapsid (N) protein. **a**, H&E stained  
653 slides were scored for pathologic effects on the y-axis (see Methods) for B.1.1.7 (left) and B.1.351  
654 (right) challenged hamsters. Vaccination groups were plotted in box plots where the horizontal  
655 bar is the median group score. Vaccination groups are given as: PBS (phosphate buffered saline)  
656 control (gray circles); 10  $\mu$ g and 0.2  $\mu$ g 2-dose vaccine regimens (blue circles); 10  $\mu$ g and 0.2  $\mu$ g  
657 1-dose vaccine regimens (red circles). **b,c**, Representative lung tissue sections from the PBS  
658 control and 10  $\mu$ g and 0.2  $\mu$ g 2-dose and 1-dose regimens with the number of vaccinations given  
659 parenthetically for B.1.1.7 (**b**) and B.1.351 (**c**) challenged hamsters in the columns as indicated.  
660 Rows are given by either H&E at 10- and 200-times magnification power (10X and 200X,  
661 respectively) or IHC of SARS-CoV-2 viral antigen at 100 times magnification power (100X). The  
662 black boxes in the top row indicate the area magnified in the middle row. Interstitial pneumonia  
663 is characterized by inflammatory cellular infiltrates (triangle), type II pneumocyte hyperplasia  
664 (thick arrow), bronchiolar epithelial hyperplasia, bronchiolar exudate (thin arrow) and edema  
665 (asterisk). SARS-CoV-2 immunopositive cells are highlighted by brown triangles. Scale bars: Top  
666 row, 1 mm; middle row, 50  $\mu$ m; bottom row, 100  $\mu$ m.

667

#### 668 **Acknowledgments**

669 We thank Morgane Rolland for molecular phylogeny and Misook Choe for SpFN expression  
670 consultation. We also thank Sebastian Molnar, Erin Kavusak, Jonah Heller, Claudelle Busano,

671 Hannah King, Sylriel Peters, Theron Jenifer and Jean-Paul Todd for technical support. We also  
672 thank Mihret Amare, Mekdi Taddese, Jarrett Headley and Yahel Romem for programmatic  
673 support and planning and Paul Scott scientific inputs and administrative oversight. This work was  
674 funded by the US Department of Defense, Defense Health Agency was executed, in part, through  
675 a cooperative agreement (W81XWH-18-2-0040) between the Henry M. Jackson Foundation for  
676 the Advancement of Military Medicine, Inc., and the U.S. Department of Defense (DOD). Material  
677 has been reviewed by the Walter Reed Army Institute of Research. The opinions or assertions  
678 contained herein are the private views of the authors, and are not to be construed as official, or  
679 as reflecting true views of the Department of the Army or the Department of Defense.

680

#### 681 **Author contributions**

682 Conceptualization, D.L.B., M.G.J., N.L.M., K.M.; Investigation, K.MW., E.K.B, W-H.C., E.J.M., I.L-N.,  
683 L.L.J., D.P-P., G.D.G, I.S., A.G., C.K., S.S., H.He., H.G., H.Ha., S.Ka., M.P., A.W., K.R., X.Z, M.R., S.A.P,  
684 G.D.G, E.K.B., D.L.B., M.G.J., N.L.M., K.M.; Data Curation—K.MW., D.L.B., M.G.J. Essential  
685 Reagents, R.S.S., A.A., E.B.M., P.M., S.J.K., A.S.P., J.R.C., M.S., G.R.M., E.A.B., D.C.D., R.A.S., Writing  
686 – Original Draft, K.MW, D.L.B., N.L.M., K.M.; Writing – Review & Editing, All authors;  
687 Visualization—K.MW., E.K.B., E.J.M., P.V.T, D.L.B., M.G.J., N.L.M. K.M.; Supervision—D.L.B.,  
688 M.G.J., S.A.P., J.D., S.P.D., J.W.F., M.G.L., S.V., N.L.M., K.M.; Funding Acquisition—K.M., N.L.M.

689

#### 690 **References**

691

- 692 1 Craven, J. (Regulatory Affairs Professionals Society, 2021).
- 693 2 Hu, B., Guo, H., Zhou, P. & Shi, Z. L. Characteristics of SARS-CoV-2 and COVID-19. *Nat Rev*  
694 *Microbiol* **19**, 141-154, doi:10.1038/s41579-020-00459-7 (2021).



- 695 3 CDC. *SARS-CoV-2 Variant Classifications and Definitions*,  
696 <[https://www.cdc.gov/coronavirus/2019-ncov/cases-updates/variant-](https://www.cdc.gov/coronavirus/2019-ncov/cases-updates/variant-surveillance/variant-info.html#Concern)  
697 [surveillance/variant-info.html#Concern](https://www.cdc.gov/coronavirus/2019-ncov/cases-updates/variant-surveillance/variant-info.html#Concern)> (2021).
- 698 4 Wang, P. *et al.* Increased Resistance of SARS-CoV-2 Variants B.1.351 and B.1.1.7 to  
699 Antibody Neutralization. *bioRxiv*, doi:10.1101/2021.01.25.428137 (2021).
- 700 5 Wibmer, C. K. *et al.* SARS-CoV-2 501Y.V2 escapes neutralization by South African COVID-  
701 19 donor plasma. *Nat Med* **27**, 622-625, doi:10.1038/s41591-021-01285-x (2021).
- 702 6 Wu, K. *et al.* mRNA-1273 vaccine induces neutralizing antibodies against spike mutants  
703 from global SARS-CoV-2 variants. *bioRxiv*, doi:10.1101/2021.01.25.427948 (2021).
- 704 7 Galloway, S. E. *et al.* Emergence of SARS-CoV-2 B.1.1.7 Lineage - United States, December  
705 29, 2020-January 12, 2021. *MMWR Morb Mortal Wkly Rep* **70**, 95-99,  
706 doi:10.15585/mmwr.mm7003e2 (2021).
- 707 8 Tegally, H. *et al.* Detection of a SARS-CoV-2 variant of concern in South Africa. *Nature* **592**,  
708 438-443, doi:10.1038/s41586-021-03402-9 (2021).
- 709 9 Rambaut, A., Loman, N., Pybus, O., Barclay, W., Barrett, J., Carabelli, A., Connor, T.,  
710 Peacock, T., Robertson, DL., Volz, E., on behalf of COVID-19 Genomics Consortium UK  
711 (CoG-UK). *Preliminary genomic characterisation of an emergent SARS-CoV-2 lineage in the*  
712 *UK defined by a novel set of spike mutations*, <[https://virological.org/t/preliminary-](https://virological.org/t/preliminary-genomic-characterisation-of-an-emergent-sars-cov-2-lineage-in-the-uk-defined-by-a-novel-set-of-spike-mutations/563/1)  
713 [genomic-characterisation-of-an-emergent-sars-cov-2-lineage-in-the-uk-defined-by-a-](https://virological.org/t/preliminary-genomic-characterisation-of-an-emergent-sars-cov-2-lineage-in-the-uk-defined-by-a-novel-set-of-spike-mutations/563/1)  
714 [novel-set-of-spike-mutations/563/1](https://virological.org/t/preliminary-genomic-characterisation-of-an-emergent-sars-cov-2-lineage-in-the-uk-defined-by-a-novel-set-of-spike-mutations/563/1)> (2020).
- 715 10 Hacısuleyman, E. *et al.* Vaccine Breakthrough Infections with SARS-CoV-2 Variants. *N Engl*  
716 *J Med* **384**, 2212-2218, doi:10.1056/NEJMoa2105000 (2021).
- 717 11 Ho, D. *et al.* Increased Resistance of SARS-CoV-2 Variants B.1.351 and B.1.1.7 to Antibody  
718 Neutralization. *Res Sq*, doi:10.21203/rs.3.rs-155394/v1 (2021).
- 719 12 Hu, J. *et al.* Emerging SARS-CoV-2 variants reduce neutralization sensitivity to  
720 convalescent sera and monoclonal antibodies. *Cell Mol Immunol* **18**, 1061-1063,  
721 doi:10.1038/s41423-021-00648-1 (2021).
- 722 13 Wang, P. *et al.* Antibody resistance of SARS-CoV-2 variants B.1.351 and B.1.1.7. *Nature*,  
723 doi:10.1038/s41586-021-03398-2 (2021).
- 724 14 Wibmer, C. K. *et al.* SARS-CoV-2 501Y.V2 escapes neutralization by South African COVID-  
725 19 donor plasma. *bioRxiv*, doi:10.1101/2021.01.18.427166 (2021).
- 726 15 Cohen, J. in *Science Magazine* (2021).
- 727 16 Garcia-Beltran, W. F. *et al.* Multiple SARS-CoV-2 variants escape neutralization by vaccine-  
728 induced humoral immunity. *Cell*, doi:10.1016/j.cell.2021.03.013 (2021).
- 729 17 Alving, C. R., Peachman, K. K., Matyas, G. R., Rao, M. & Beck, Z. Army Liposome  
730 Formulation (ALF) family of vaccine adjuvants. *Expert Rev Vaccines* **19**, 279-292,  
731 doi:10.1080/14760584.2020.1745636 (2020).
- 732 18 Joyce, M. G. *et al.* Efficacy of a Broadly Neutralizing SARS-CoV-2 Ferritin Nanoparticle  
733 Vaccine in Nonhuman Primates. *bioRxiv*, doi:10.1101/2021.03.24.436523 (2021).
- 734 19 King, H. A. D. *et al.* Efficacy and breadth of adjuvanted SARS-CoV-2 receptor-binding  
735 domain nanoparticle vaccine in macaques. *bioRxiv*, doi:10.1101/2021.04.09.439166  
736 (2021).
- 737 20 Joyce, M. G. *et al.* SARS-CoV-2 ferritin nanoparticle vaccines elicit broad SARS coronavirus  
738 immunogenicity. *bioRxiv*, doi:10.1101/2021.05.09.443331 (2021).

- 739 21 Chan, J. F. *et al.* Simulation of the Clinical and Pathological Manifestations of Coronavirus  
740 Disease 2019 (COVID-19) in a Golden Syrian Hamster Model: Implications for Disease  
741 Pathogenesis and Transmissibility. *Clin Infect Dis* **71**, 2428-2446, doi:10.1093/cid/ciaa325  
742 (2020).
- 743 22 Sia, S. F. *et al.* Pathogenesis and transmission of SARS-CoV-2 in golden hamsters. *Nature*  
744 **583**, 834-838, doi:10.1038/s41586-020-2342-5 (2020).
- 745 23 Imai, M. *et al.* Syrian hamsters as a small animal model for SARS-CoV-2 infection and  
746 countermeasure development. *Proc Natl Acad Sci U S A* **117**, 16587-16595,  
747 doi:10.1073/pnas.2009799117 (2020).
- 748 24 Tostanoski, L. H. *et al.* Ad26 vaccine protects against SARS-CoV-2 severe clinical disease in  
749 hamsters. *Nat Med* **26**, 1694-1700, doi:10.1038/s41591-020-1070-6 (2020).
- 750 25 Munoz-Fontela, C. *et al.* Animal models for COVID-19. *Nature* **586**, 509-515,  
751 doi:10.1038/s41586-020-2787-6 (2020).
- 752 26 Hoffmann, M. *et al.* SARS-CoV-2 Cell Entry Depends on ACE2 and TMPRSS2 and Is Blocked  
753 by a Clinically Proven Protease Inhibitor. *Cell* **181**, 271-280 e278,  
754 doi:10.1016/j.cell.2020.02.052 (2020).
- 755 27 Fischer, R. J. *et al.* ChAdOx1 nCoV-19 (AZD1222) protects hamsters against SARS-CoV-2  
756 B.1.351 and B.1.1.7 disease. *bioRxiv*, doi:10.1101/2021.03.11.435000 (2021).
- 757 28 CDC. *COVID Data Tracker* < [https://covid.cdc.gov/covid-data-tracker/?CDC\\_AA\\_refVal=https%3A%2F%2Fwww.cdc.gov%2Fcoronavirus%2F2019-ncov%2Fcases-updates%2Fvariant-proportions.html#variant-proportions](https://covid.cdc.gov/covid-data-tracker/?CDC_AA_refVal=https%3A%2F%2Fwww.cdc.gov%2Fcoronavirus%2F2019-ncov%2Fcases-updates%2Fvariant-proportions.html#variant-proportions) > (2021).
- 760 29 Karim, F. M., MYS; Gosnell, BI; Cele, S; Giandhari, J; Pillay, S; Tegally, H; Wilkinson, E; San,  
761 JE; Msomi, N; Mlisana, K; Khan, K; Bernstein, M; Manickchand, N; Singh, L; Ramphal, U;  
762 COMMIT-KZN Team, Hanekom, W; Lessells, RJ; Sigal, A; de Oliveira, T. Persistent SARS-  
763 CoV-2 infection and intra-host evolution in association with advanced HIV infection.  
764 doi:<https://doi.org/10.1101/2021.06.03.21258228> (2021).
- 765 30 Schafer, A. *et al.* Antibody potency, effector function, and combinations in protection and  
766 therapy for SARS-CoV-2 infection in vivo. *J Exp Med* **218**, doi:10.1084/jem.20201993  
767 (2021).
- 768 31 Suryadevara, N. *et al.* Neutralizing and protective human monoclonal antibodies  
769 recognizing the N-terminal domain of the SARS-CoV-2 spike protein. *bioRxiv*,  
770 doi:10.1101/2021.01.19.427324 (2021).
- 771 32 Suryadevara, N. *et al.* Neutralizing and protective human monoclonal antibodies  
772 recognizing the N-terminal domain of the SARS-CoV-2 spike protein. *Cell* **184**, 2316-2331  
773 e2315, doi:10.1016/j.cell.2021.03.029 (2021).
- 774 33 Winkler, E. S. *et al.* Human neutralizing antibodies against SARS-CoV-2 require intact Fc  
775 effector functions for optimal therapeutic protection. *Cell* **184**, 1804-1820 e1816,  
776 doi:10.1016/j.cell.2021.02.026 (2021).
- 777 34 Winkler, E. S. *et al.* Human neutralizing antibodies against SARS-CoV-2 require intact Fc  
778 effector functions and monocytes for optimal therapeutic protection. *bioRxiv*,  
779 doi:10.1101/2020.12.28.424554 (2020).
- 780 35 Mercado, N. B. *et al.* Publisher Correction: Single-shot Ad26 vaccine protects against  
781 SARS-CoV-2 in rhesus macaques. *Nature* **590**, E25, doi:10.1038/s41586-020-03100-y  
782 (2021).

- 783 36 Mercado, N. B. *et al.* Single-shot Ad26 vaccine protects against SARS-CoV-2 in rhesus  
784 macaques. *Nature* **586**, 583-588, doi:10.1038/s41586-020-2607-z (2020).
- 785 37 Yu, J. *et al.* DNA vaccine protection against SARS-CoV-2 in rhesus macaques. *Science* **369**,  
786 806-811, doi:10.1126/science.abc6284 (2020).
- 787 38 Corbett, K. S. *et al.* Evaluation of the mRNA-1273 Vaccine against SARS-CoV-2 in  
788 Nonhuman Primates. *N Engl J Med* **383**, 1544-1555, doi:10.1056/NEJMoa2024671 (2020).
- 789 39 Hoffmann, D. C., B; Rauch, S; Roth, N; Mühe, J; Halwe, NJ; Ulrich, L; Fricke, C; Schön, J;  
790 Kraft, A; Breithaupt, A; Wernike, K; Michelitsch, A; Sick, F; Wylezich, C; Müller, SO;  
791 Mettenleiter, TC; Petsch, B; Dorhoi, A; Beer, M. CVnCoV protects human ACE2 transgenic  
792 mice from ancestral B BavPat1 and emerging B.1.351 SARS-CoV-2. *bioRxiv*,  
793 doi:<https://doi.org/10.1101/2021.03.22.435960> (2021).
- 794 40 Carmen, J. S., S; Lu, Z; Anderson, A; Morrison, EB; Sankhala, RS; Chen, W-H; Chang, WC;  
795 Bolton, JS; Matyas, GR; Michael, NL; Joyce, MG; Modjarrad, K; Currier, JR; Bergmann-  
796 Leitner, E; Malloy, AMW; Rao, M. A spike-ferritin nanoparticle vaccine induces robust  
797 innate immune activity and drives polyfunctional SARS-CoV-2-specific T cells.  
798 doi:<https://doi.org/10.1101/2021.04.28.441763> (2021).
- 799 41 Tegally, H. e. a. Emergence and rapid spread of a new severe acute respiratory syndrome-  
800 related coronavirus 2 (SARS-CoV-2) lineage with multiple spike mutations in South Africa.  
801 *medRxiv*, doi:<https://doi.org/10.1101/2020.12.21.20248640> (2020).  
802  
803

804 **Supplemental material**

805

806 **Supplemental Figure 1. Additional antibody responses following SpFN-ALFQ immunization. a,**

807 ELISA was performed using either WA1 derived Receptor Binding Domain (RBD) or S-2P Spike

808 proteins from sera taken at week 8. The vaccine regimens are indicated on the x-axis by

809 phosphate buffered saline (PBS) control or SpFN dose with the number of vaccinations in the

810 regimen given parenthetically and by color code (blue, 2-dose, red, 1-dose). Endpoint titers are

811 given on the y-axis as geometric mean titers with data displayed in box plots with the top and

812 bottom bars of the box the standard deviation and the middle bar as the median value. P-values

813 for SpFN-ALFQ vaccination groups compared with PBS control are given just above the boxes in

814 light grey while inter- and intra-regimen p-values are given above the boxes in black. ns, not

815 significant ( $p > 0.05$ ). **b,** Octet Biolayer Interferometry (BLI) responses against the WA1, B.1.1.7,

816 and B.1.351 sequences of the RBD are given for the vaccination regimens as in **a** on the x-axis

817 from sera collected at week 8. BLI responses are given in nanometers (nm) on the y-axis.

818 Vaccination regimen color coding and statistical treatments are as in **a**. **c,** IgG opsonization as

819 measured by binding to SARS-CoV-2 Spike protein expressing expi293F cells subsequently stained

820 by fluorescently tagged goat anti-hamster IgG and detected by flow cytometry. Fluorescence is

821 given as mean fluorescence intensity (MFI) on the y-axis. Vaccination regiment color coding and

822 statistical treatments are as in **a**.

823

824 **Supplemental Fig 2. Quantitative SARS-CoV-2 total and subgenomic mRNA (sgmRNA) viral load**

825 **from oral swabs following challenge.** Oral fluid collection from were obtained by swabbing at

826 days 2, 4, and 6 post challenge in hamsters and submitted to quantitative SARS-CoV-2 total and

827 sgmRNA analysis. Viral load is given on y-axes at copies/mL of oral fluid plotted on a log<sub>10</sub> scale.  
828 Vaccination regimen groups, stratified by day post-challenge, are given on the x-axes: Phosphate  
829 buffered saline (PBS) control, gray circles; 10 µg and 0.2 µg 2-dose regimen groups, blue circles;  
830 10 µg and 0.2 µg 1-dose regimen groups, red circles. Data are given in box plots where the  
831 horizontal bar is the median value for each group. Where values between groups are statistically  
832 meaningfully different, p-values are given above horizontal black bars showing the analyzed  
833 groups. In all other cases, the p-values were > 0.05. **a**, sgmRNA viral load from B.1.1.7 challenged  
834 hamsters; **(B)** total RNA viral load from B.1.1.7 challenged hamsters; **c**, sgmRNA viral load from  
835 B.1.351 challenged hamsters; **d**, total RNA viral load from B.1. 351 challenged hamsters.

836

#### 837 **Supplemental Table 1. Semi-quantitative histopathology and IHC scores**

838 Lung tissues were collected at necropsy on day 6 post-challenge, fixed with neutral buffered  
839 formalin, and stained with hematoxylin and eosin (H&E) for standard microscopic examination  
840 as well as submitted for immunohistochemical (IHC) staining for SARS-CoV-2 nucleocapsid (N)  
841 protein. (A) H&E sections were semi-quantitatively scored on the histopathology present in all  
842 lung sections examined (Methods). The overall severity of interstitial pneumonia (IP) present in  
843 individual animals in the PBS control and vaccinated groups is given. (B) IHC sections were  
844 examined at 400X magnification, and evaluated for the number of immunopositive cells per slide.  
845 Distribution of the number of immunopositive cells per section is given per PBS control and 2-  
846 dose and 1-dose vaccine group. The number of vaccinations per vaccine group are given  
847 parenthetically.

848

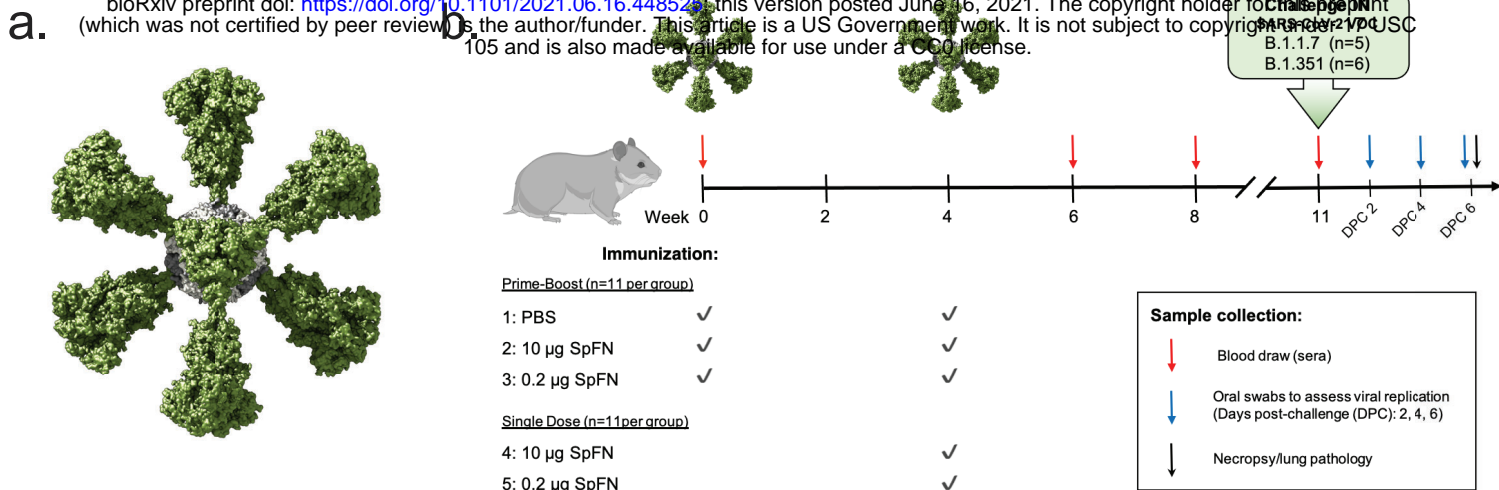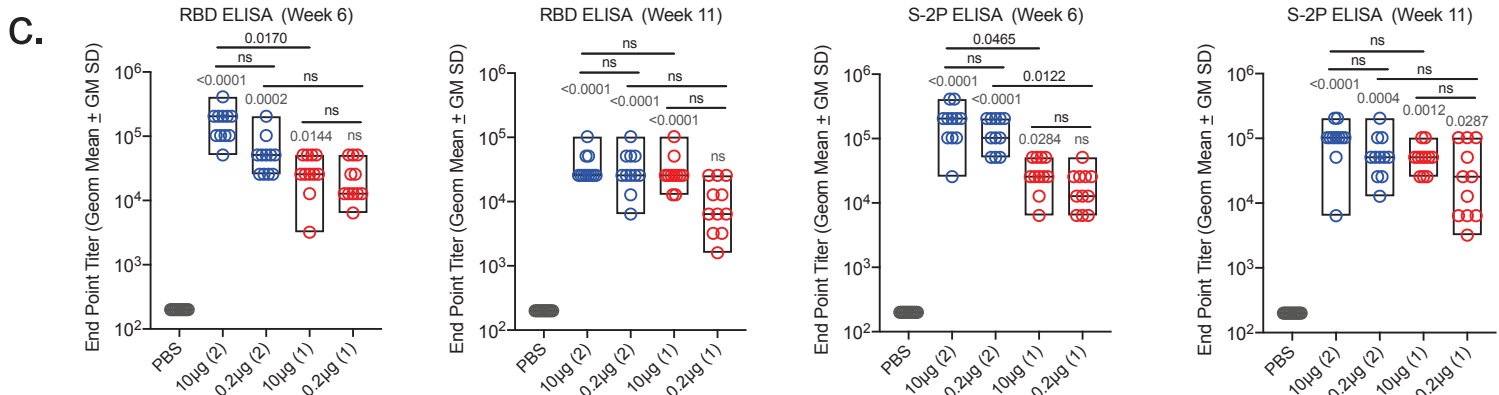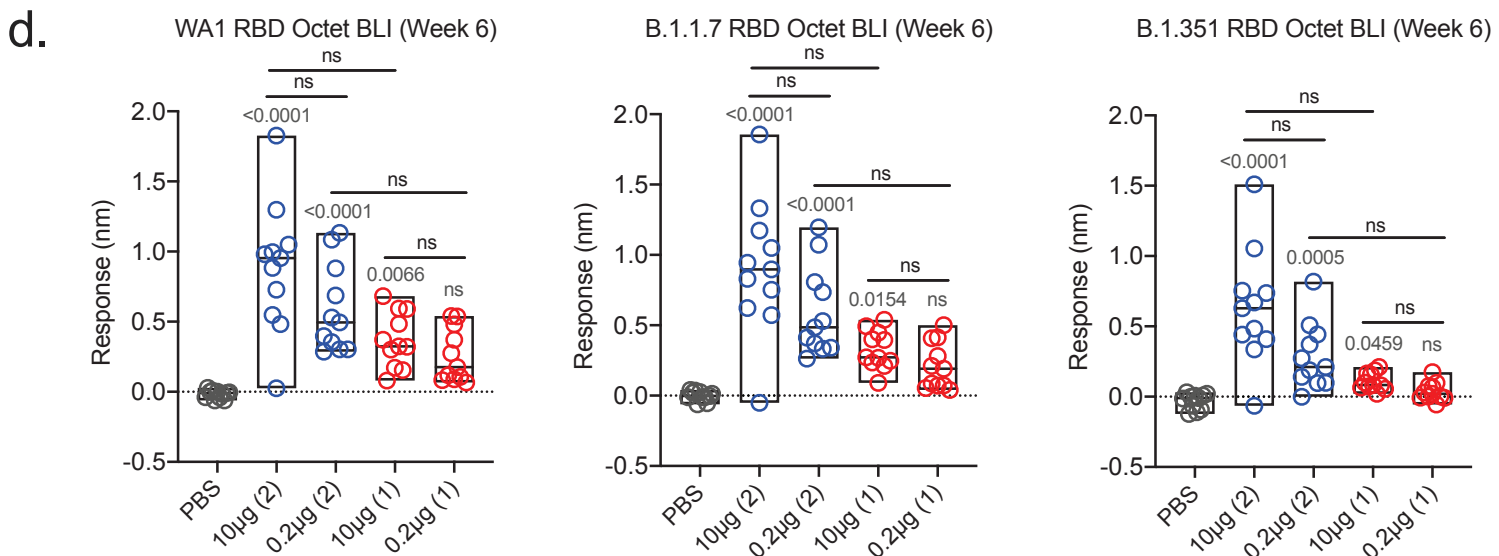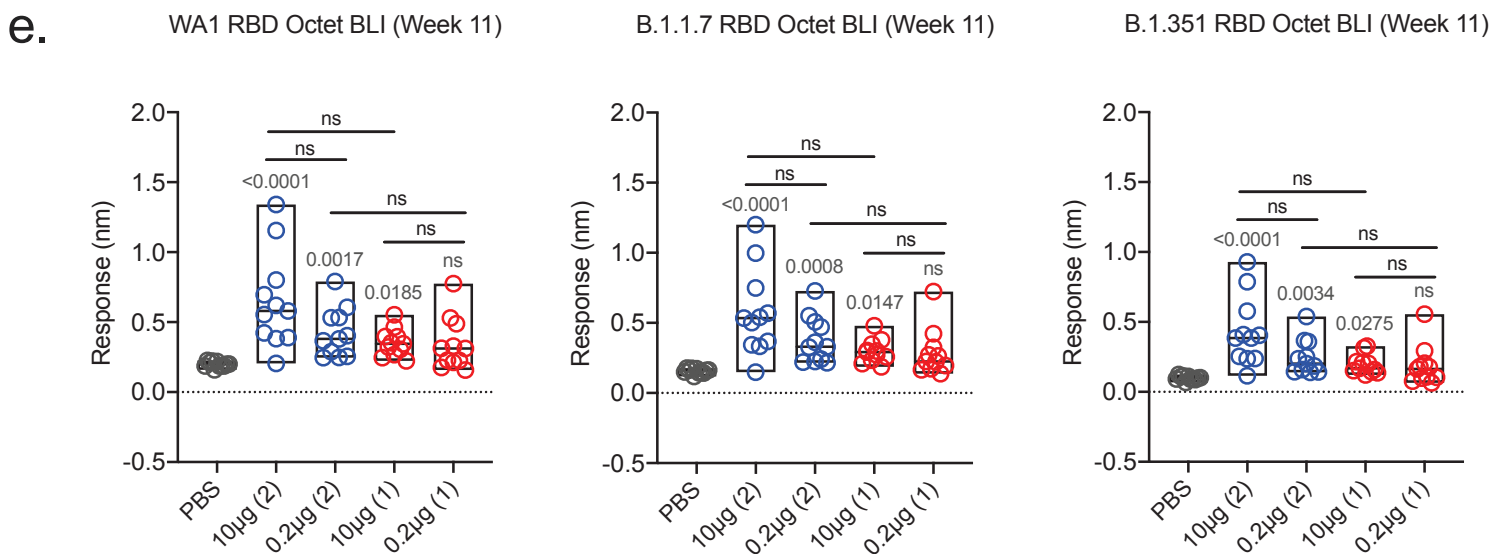

**a.** hACE2 Competition Assay (Week 6)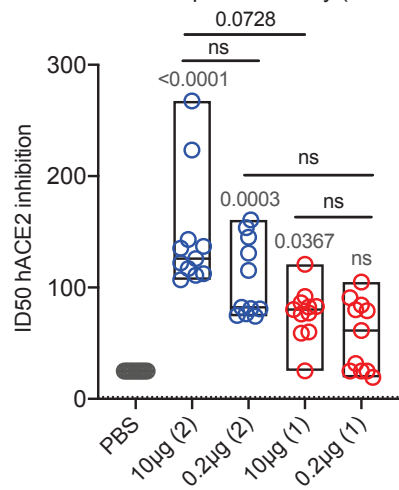

hACE2 Competition Assay (Week 8)

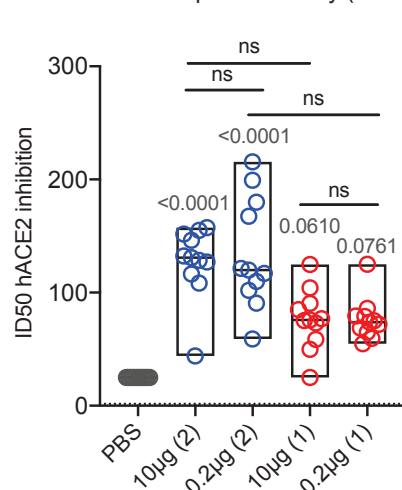

hACE2 Competition Assay (Week 11)

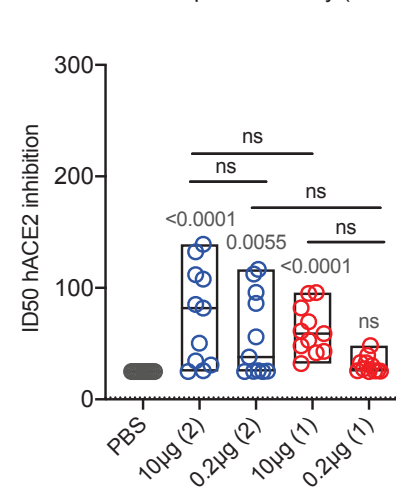**b.** WA1 PSV Neutralization (Week 6)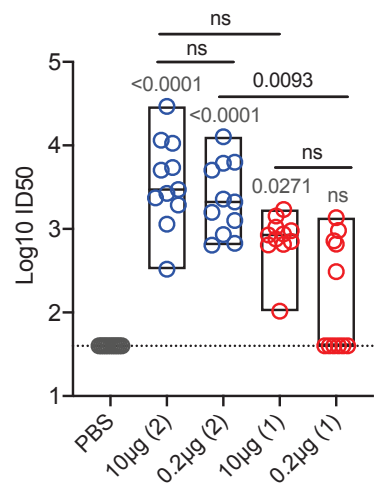

B.1.1.7 PSV Neutralization (Week 6)

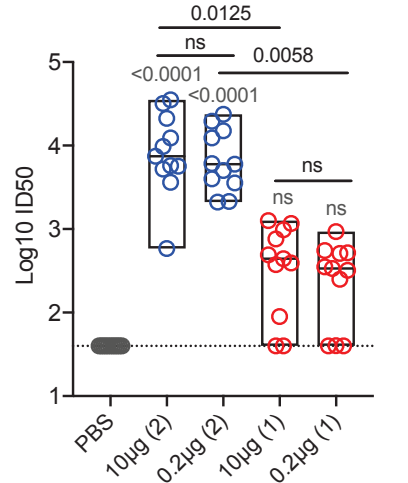

B.1.351 PSV Neutralization (Week 6)

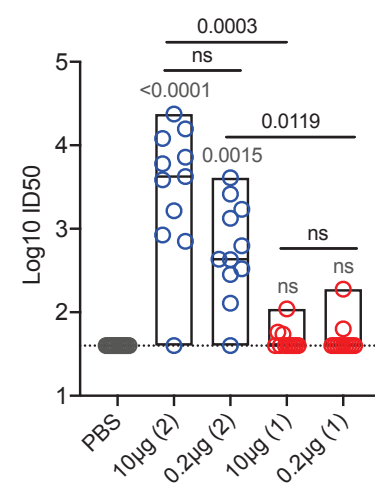

SARS1 PSV Neutralization (Week 6)

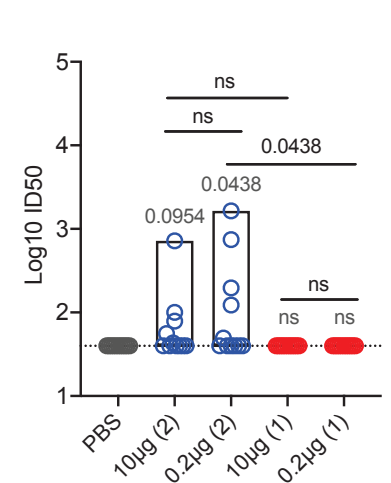**c.** WA1 PSV Neutralization (Week 11)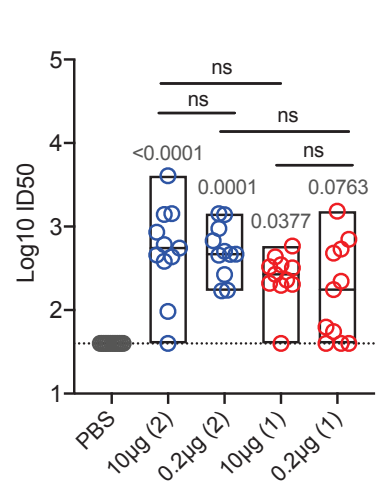

B.1.1.7 PSV Neutralization (Week 11)

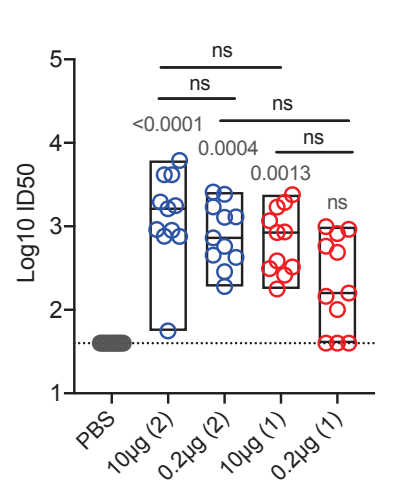

B.1.351 PSV Neutralization (Week 11)

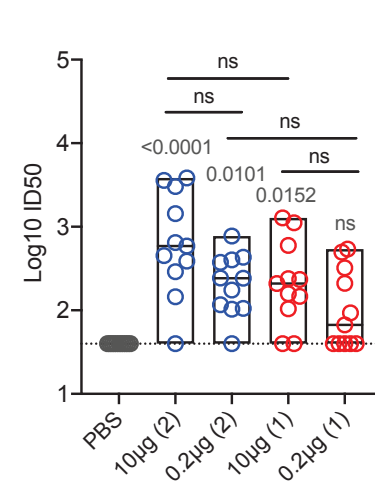

SARS1 PSV Neutralization (Week 11)

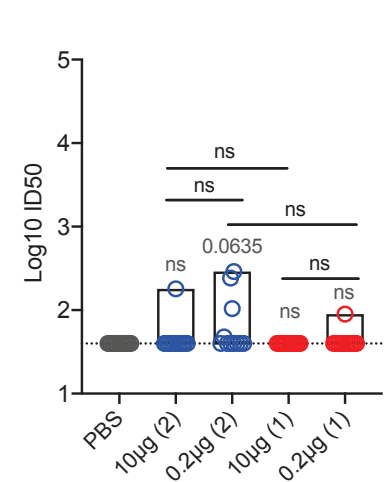

a.

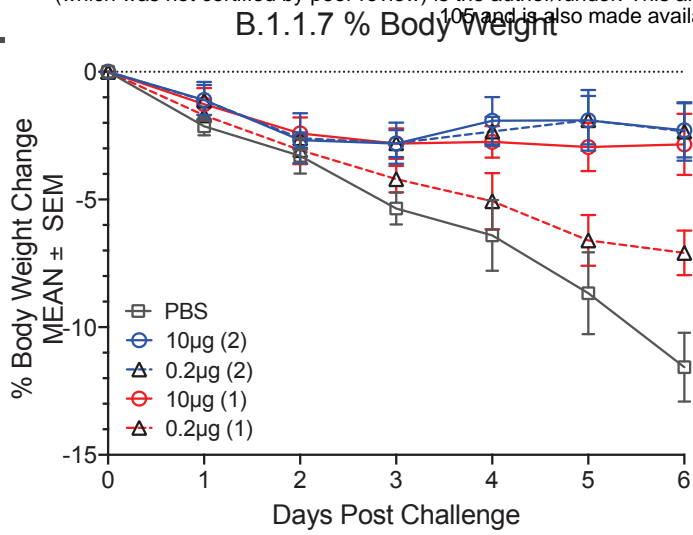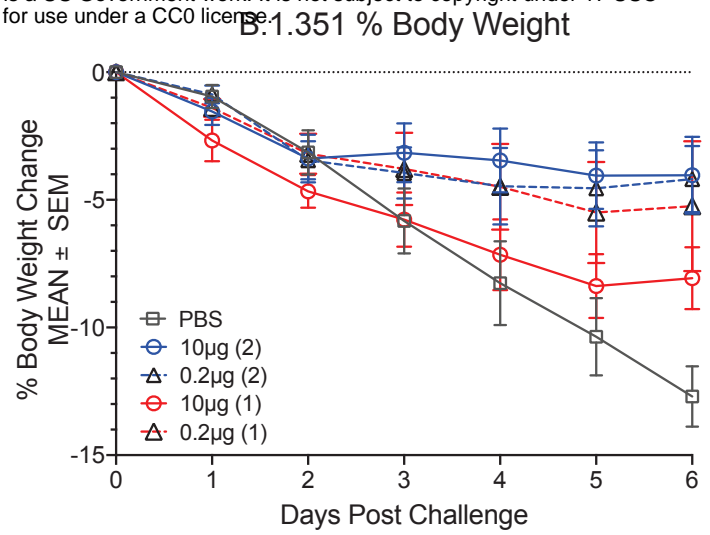

b.

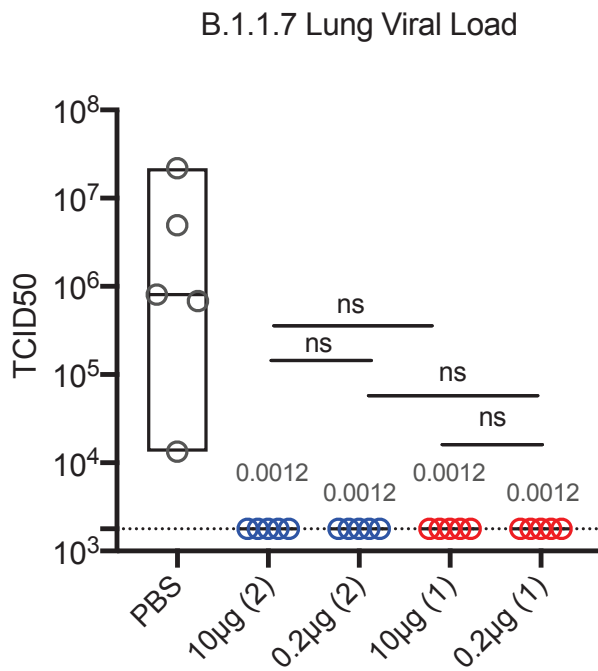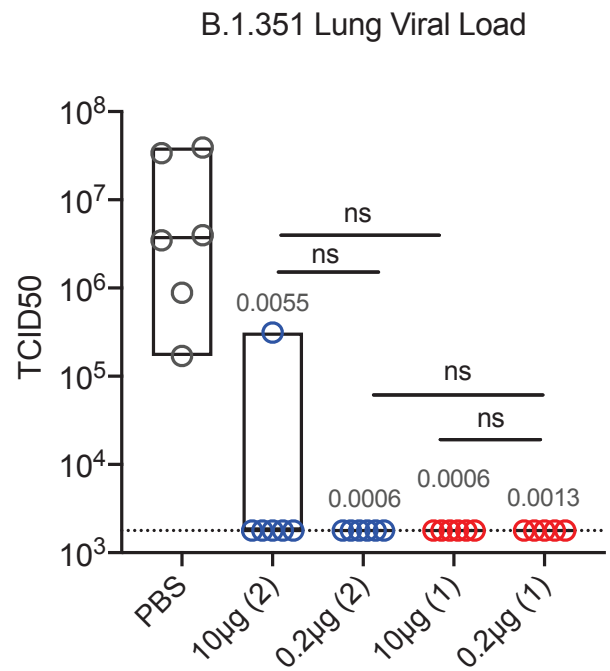

c.

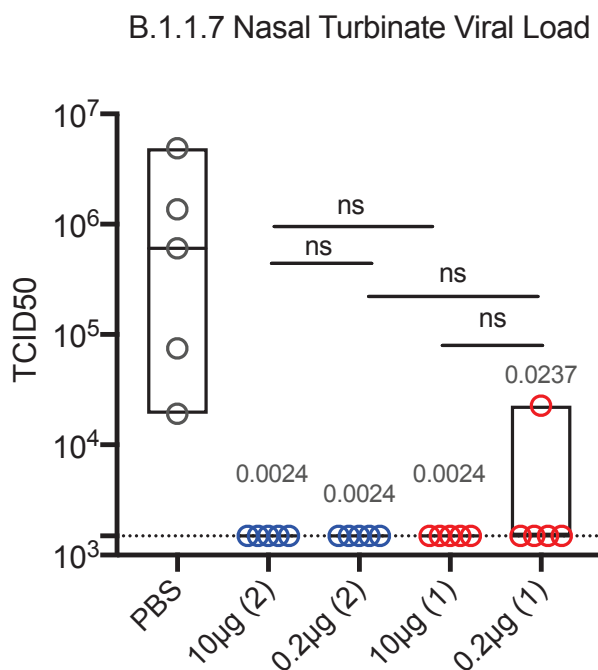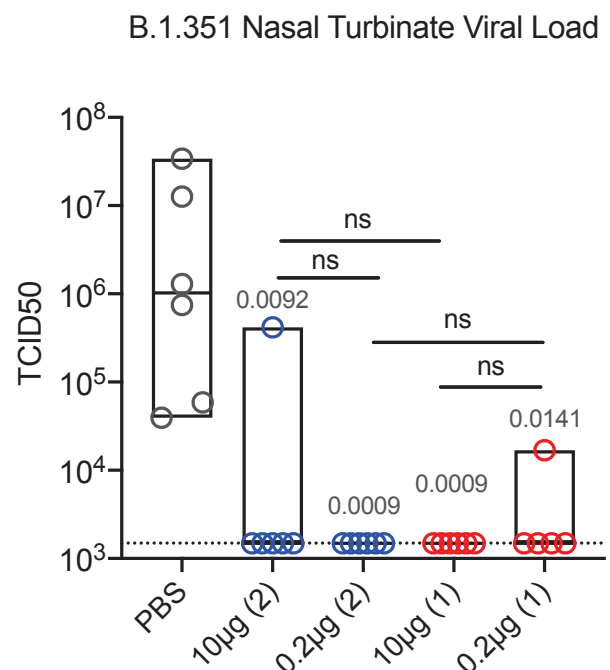



a.

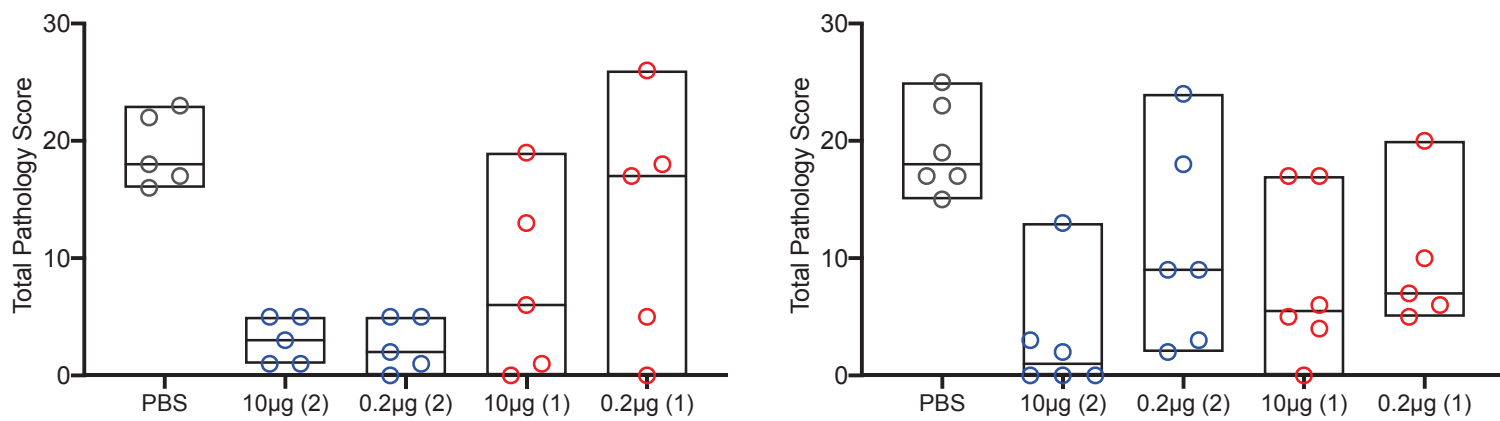

b.

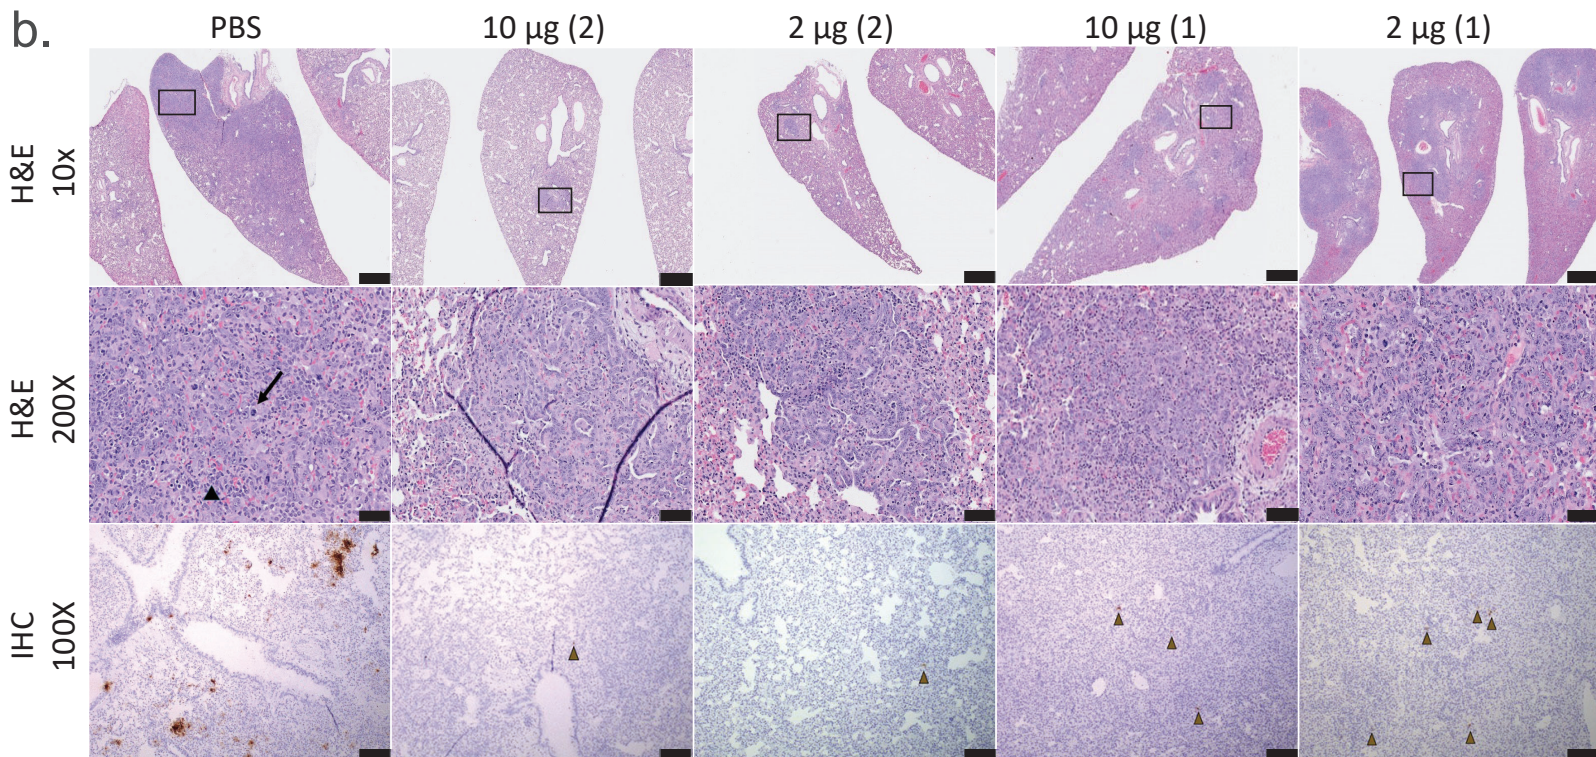

c.

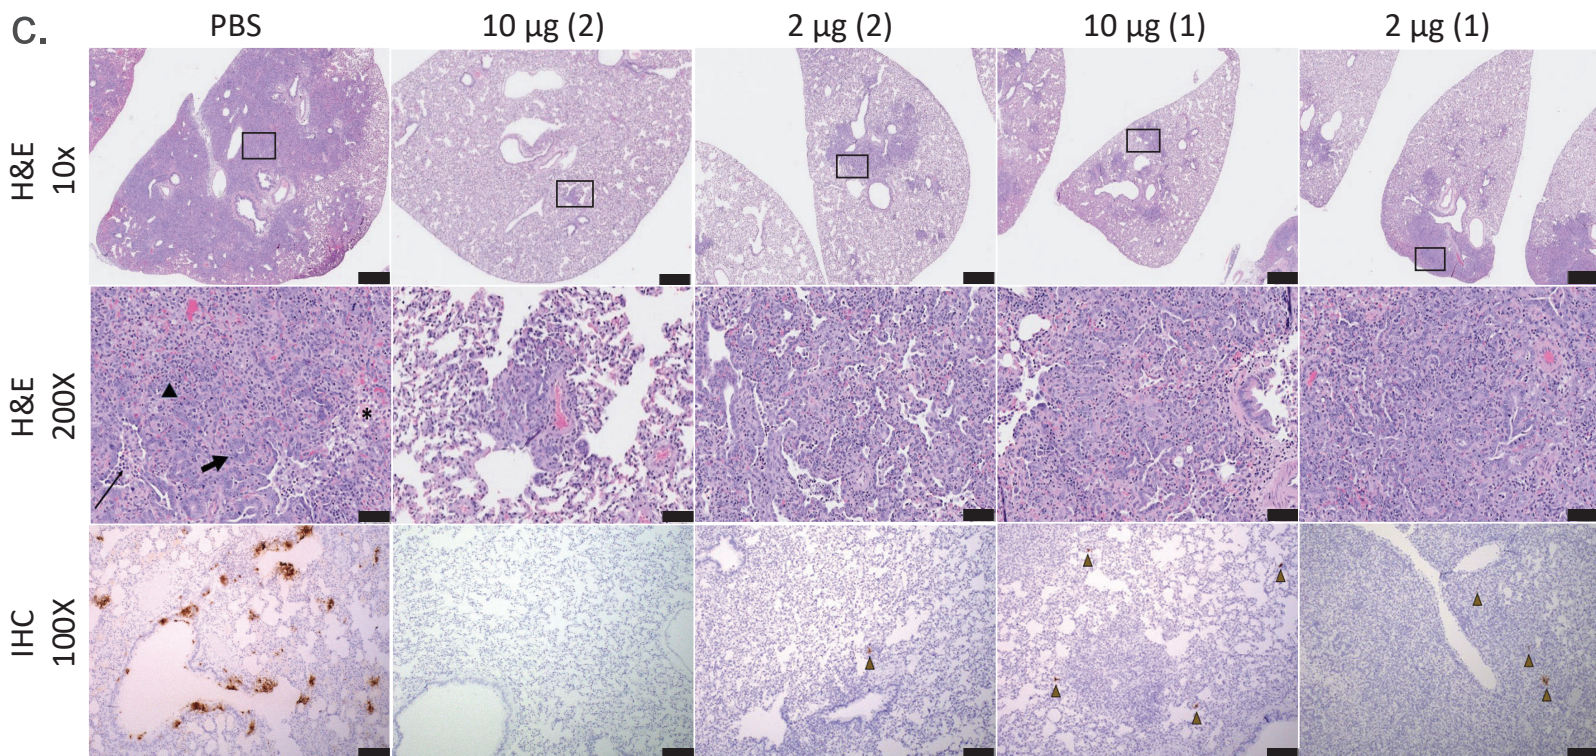

Source: https://www.biorxiv.org/content/10.1101/2021.06.16.448525v1.full.pdf
